# Supplementary material
Source: publisher figshare collection journal article supplement (https://acs.figshare.com/ndownloader/files/4452541)
Supplement: Supplementary file 1 [file 4452541]

## Supporting information

# Reaction of Dichloromethane with Pyridine Derivatives under Ambient Conditions

Alexander B. Rudine, Michael G. Walter, and Carl C. Wamser\*

*Department of Chemistry, Portland State University, Portland, Oregon 97207-0751*

*\* To whom correspondence should be addressed. E-mail: [wamserc@pdx.edu](mailto:wamserc@pdx.edu)*

## Table of Contents

|                                               |    |
|-----------------------------------------------|----|
| 1. General Experimental Section               | 2  |
| 2. Additional Compound Characterization*      | 3  |
| 2.1 (3a)                                      | 3  |
| 2.2 (2a)                                      | 8  |
| 2.3 (2b)                                      | 10 |
| 3. New Compound Characterization              | 12 |
| 3.1 (3b)                                      | 12 |
| 3.2 (3c)                                      | 18 |
| 3.3 (3d)                                      | 23 |
| 3.4 (3e)                                      | 28 |
| 3.5 (3f)                                      | 33 |
| 4. Kinetic Plots and Calculations             | 38 |
| 4.1 Kinetic plots for overall process         | 38 |
| 4.2 Kinetic plots for second step             | 41 |
| 4.3 <sup>1</sup> H NMR plots for NMR kinetics | 44 |

\* New characterization data for previously reported compounds.

## **(1) General Experimental**

**Materials and Instrumentation.** Anhydrous pyridine, thionyl chloride, and paraformaldehyde were 99.8, 99, and 95 %, respectively. Other pyridine derivatives were typically 98% or better and used as received. Dichloromethane (ACS certified) and acetonitrile (HPLC grade) were used as received. DMSO-d<sub>6</sub> and D<sub>2</sub>O were 99.9% D. Mass spectral data were acquired using a high-resolution (30,000) Thermo LTQ-Orbitrap Discovery hybrid mass spectrometry instrument equipped with an electrospray ionization source operating in the positive mode. The mass spectrometer was externally calibrated prior to data acquisition allowing accurate mass measurements for M<sup>2+</sup> ions to be obtained within 3 ppm.

## **(2) Additional Compound Characterization (3a)**

### **(2.1) 1,1'-methylenebispyridinium dichloride (3a).**

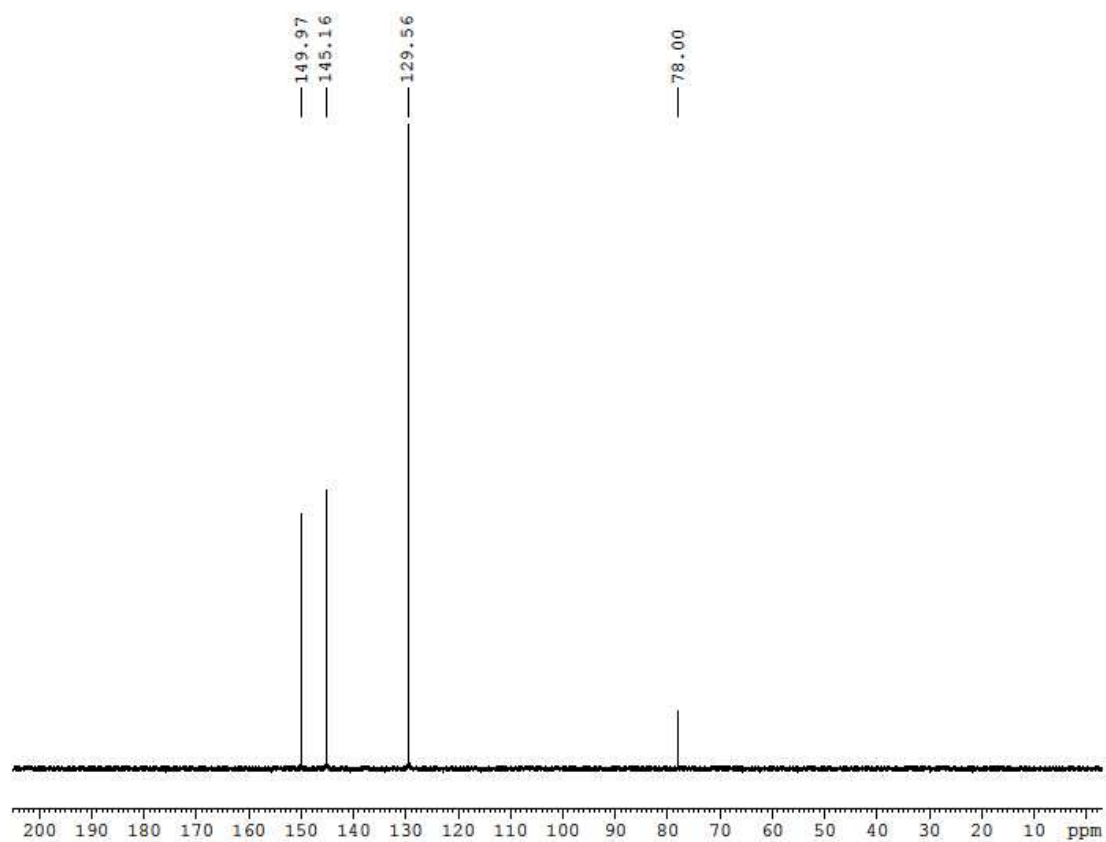

**Figure S1.** Carbon NMR spectrum of compound **3a** in D<sub>2</sub>O.

09120902\_091209113057 #14-33 RT: 0.16-0.36 AV: 20 NL: 1.51E6  
T: FTMS + p ESI Full ms [50.00-1200.00]

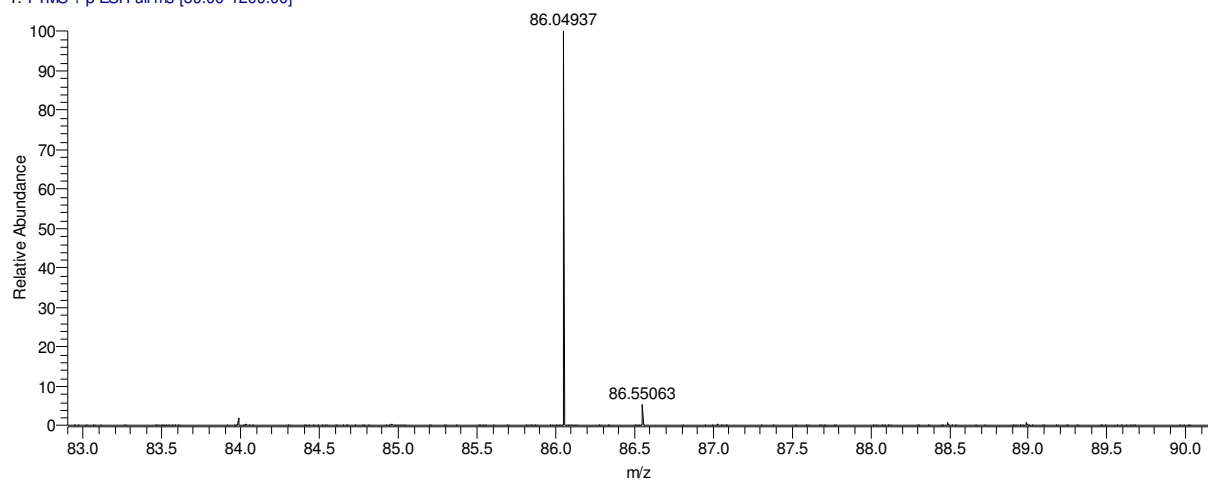

09120902\_091209113057 #14-33 RT: 0.16-0.36 AV: 20 NL: 1.51E6  
T: FTMS + p ESI Full ms [50.00-1200.00]

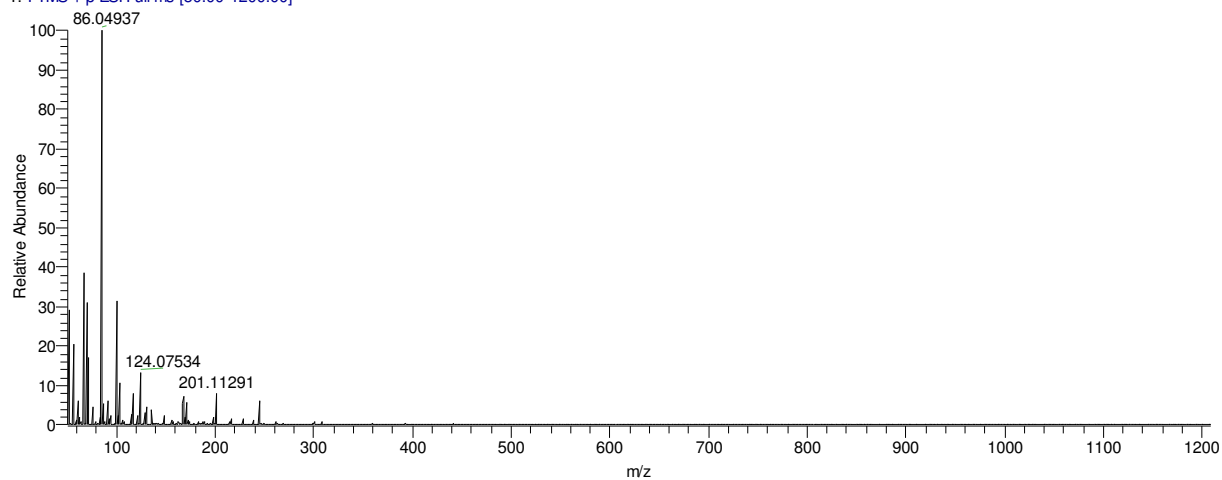

**Figure S2.** ESI (positive mode) HRMS of compound **3a**, showing the peak for the  $M^{2+}$  ion without  $Cl^-$  counterions.

c11h12n2: C11 H12 N2 pa Chrg 2

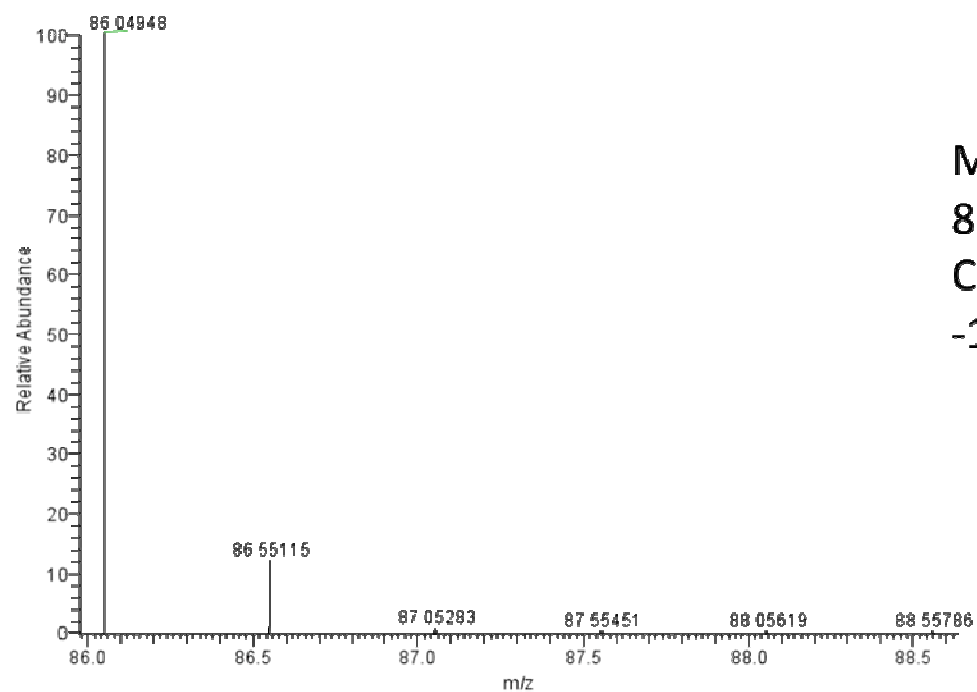

Measured  $M^{2+}$   
86.04937  
Cal 86.04948  
-1.28 ppm

**Figure S3.** Calculated ESI (positive mode) HRMS spectrum for compound **3a**,  $M^{2+}$  ion without  $Cl^-$  counterions.

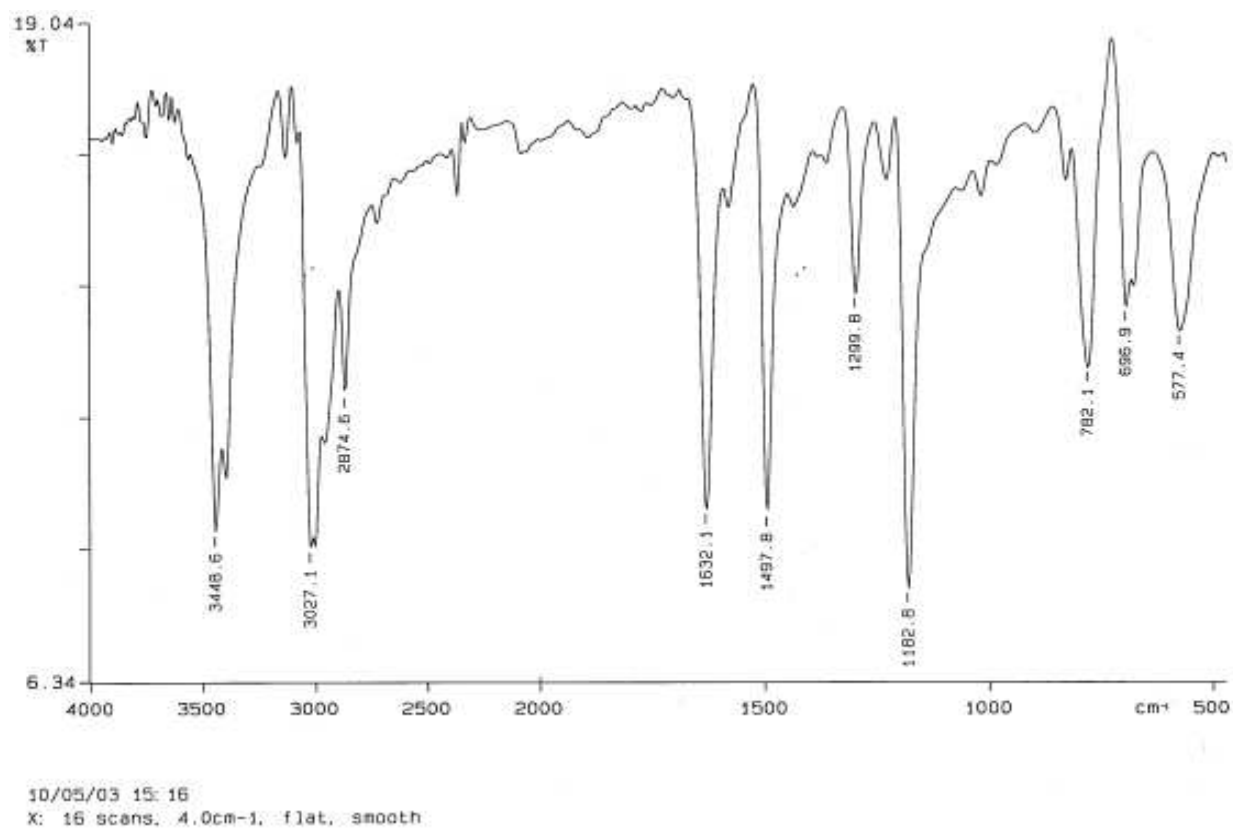

**Figure S4.** IR spectrum (KBr pellet) of compound **3a** showing vibrations at 3027 cm<sup>-1</sup> (=C-H), 2874 cm<sup>-1</sup> (-C-H), 1632 and 1497 cm<sup>-1</sup> (C=C), 1182 cm<sup>-1</sup> (C-N).

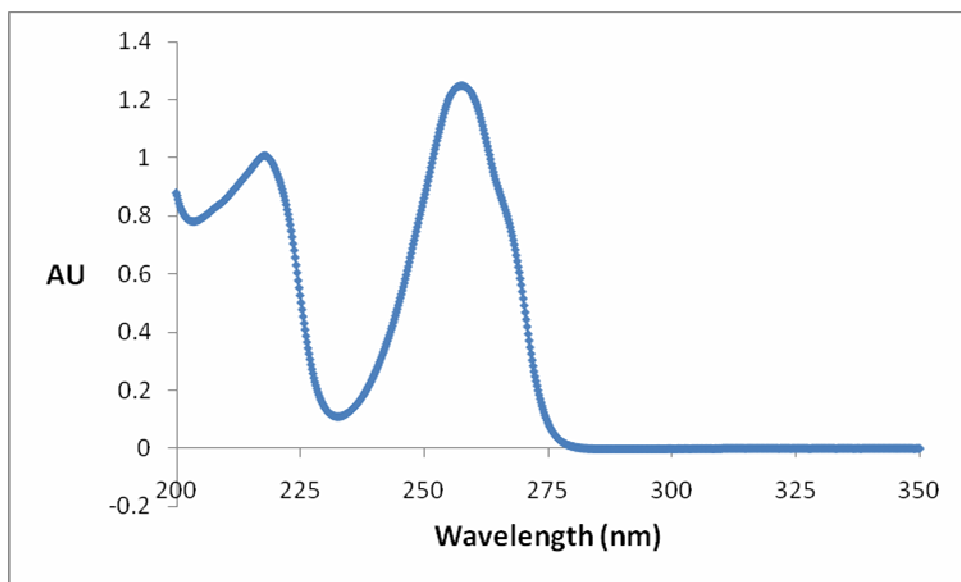

**Figure S5.** UV-Visible spectrum of **3a** in H<sub>2</sub>O.

**(2.2) 1-Chloromethylpyridinium chloride (2a).**

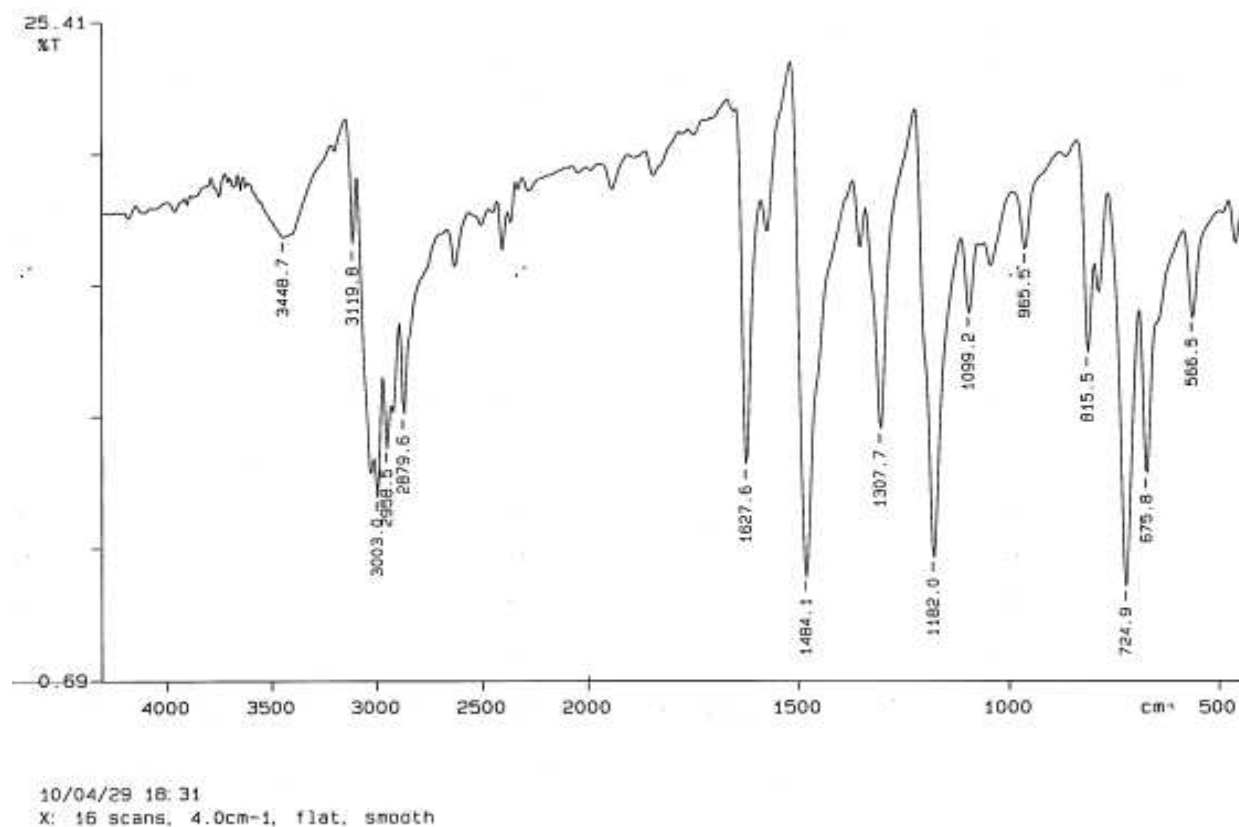

**Figure S6.** IR spectrum (KBr pellet) of compound **2a** showing vibrations at  $3003\text{ cm}^{-1}$  ( $=\text{C-H}$ ),  $2958\text{ cm}^{-1}$  ( $-\text{C-H}$ ),  $1627$  and  $1484\text{ cm}^{-1}$  ( $\text{C}=\text{C}$ ),  $1182\text{ cm}^{-1}$  ( $\text{C-N}$ ),  $1307$  and  $725\text{ cm}^{-1}$  ( $\text{C-Cl}$ ).



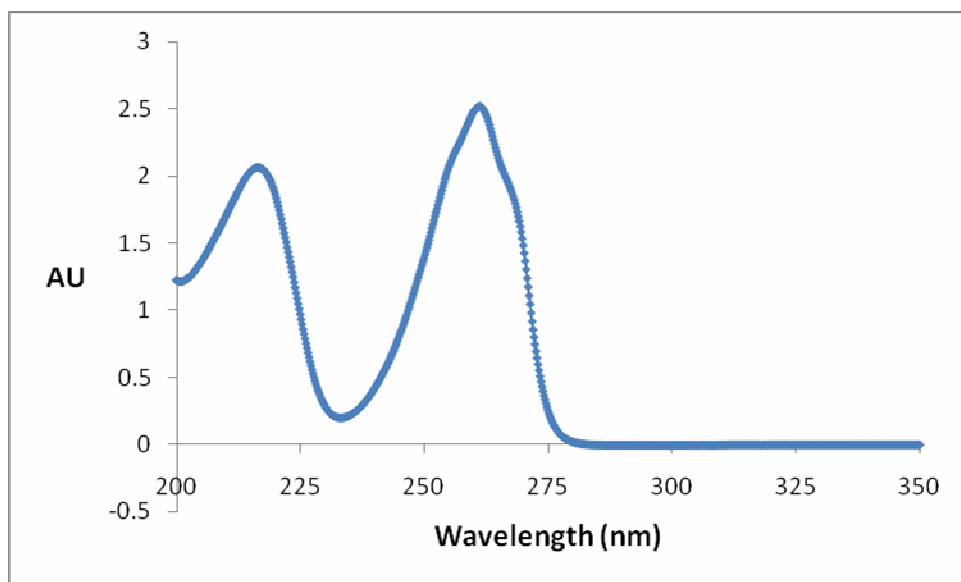

**Figure S7.** UV-Visible spectrum of **2a** in H<sub>2</sub>O.

**(2.3) 1-Chloromethyl-4-(dimethylamino)pyridinium chloride (2b).**

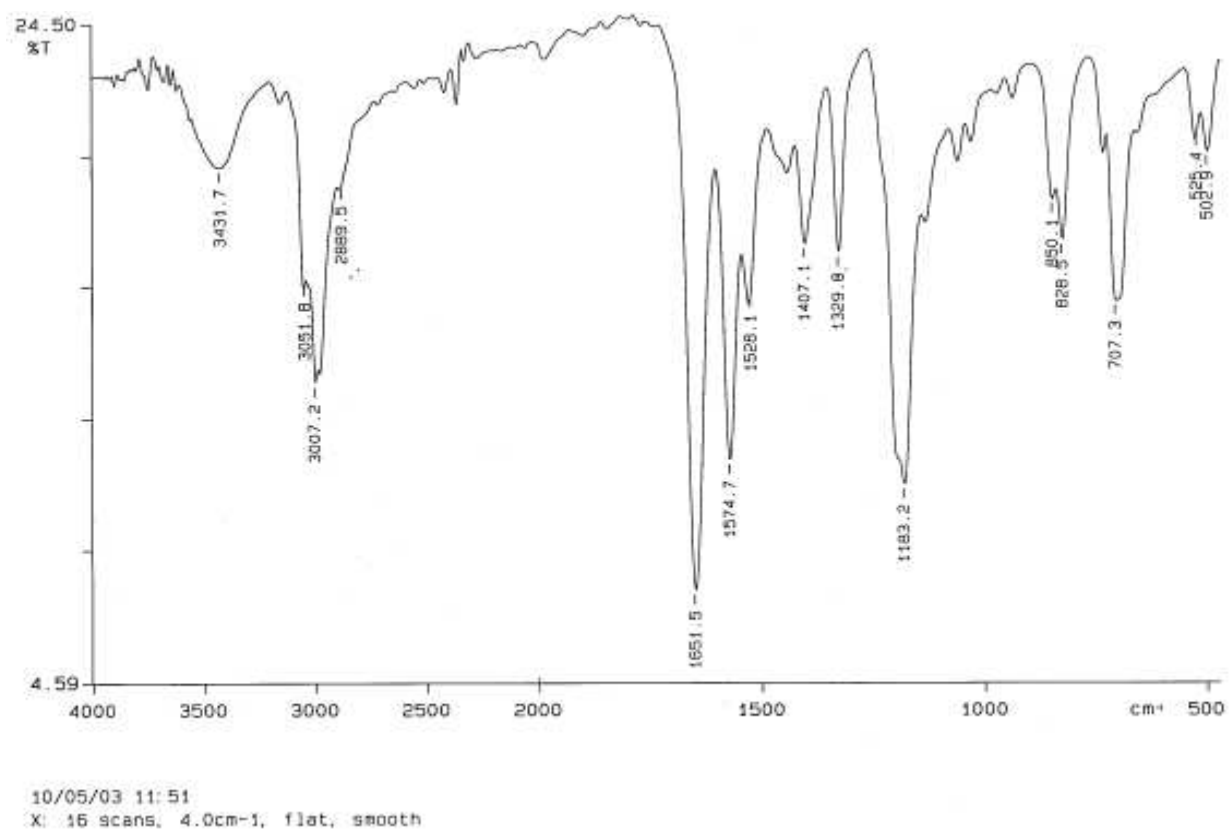

**Figure S8.** IR spectrum (KBr pellet) of compound **2b** showing vibrations at  $3007\text{ cm}^{-1}$  ( $=\text{C-H}$ ),  $2899\text{ cm}^{-1}$  ( $-\text{C-H}$ ),  $1651\text{ cm}^{-1}$  ( $\text{C}=\text{C}$ ),  $1183\text{ cm}^{-1}$  ( $\text{C-N}$ ),  $1329$  and  $707\text{ cm}^{-1}$  ( $\text{C-Cl}$ ).

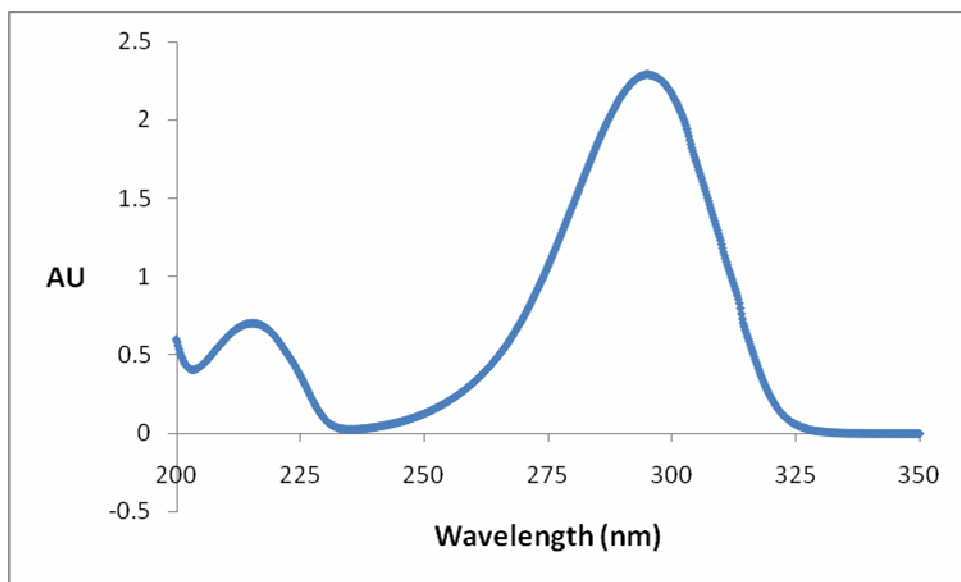

**Figure S9.** UV-Visible spectrum of **2b** in H<sub>2</sub>O.

### (3) New Compound Characterization (3b-f)

#### **(3.1) 1,1'-methylenebis(4-dimethylaminopyridinium) dichloride (3b).**

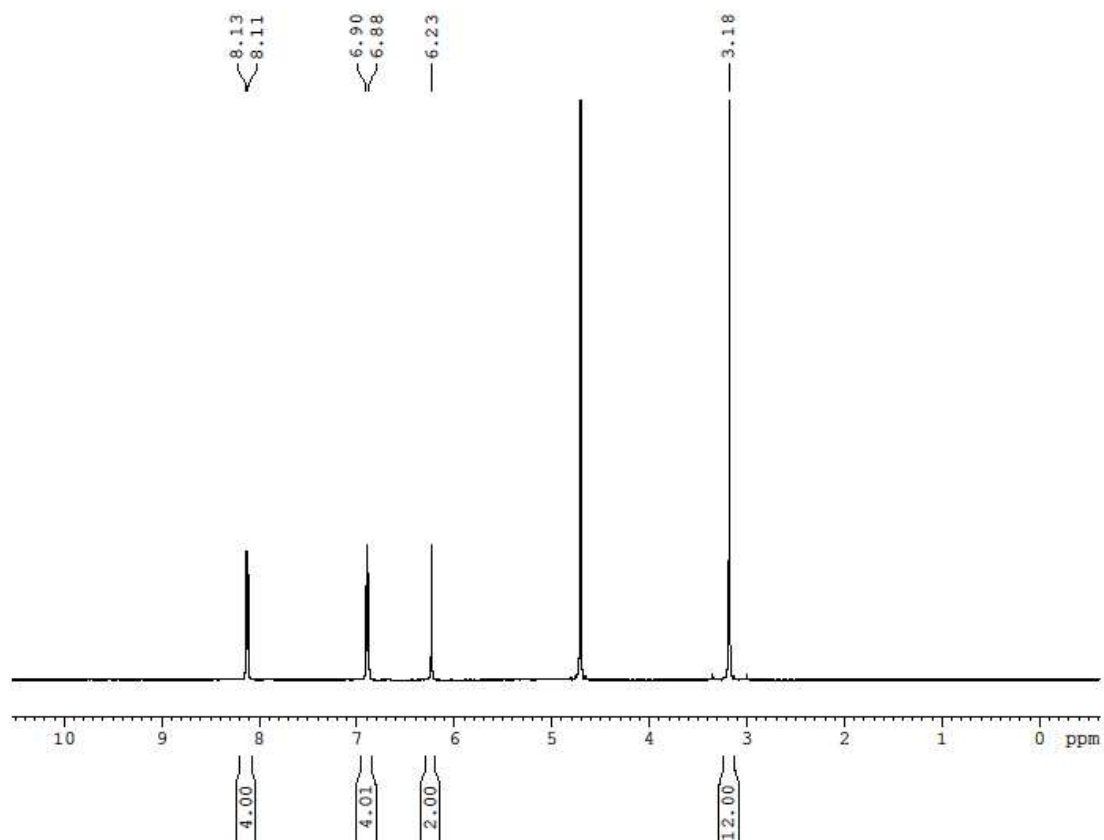

**Figure S10.** Proton NMR spectrum of compound **3b** in D<sub>2</sub>O.

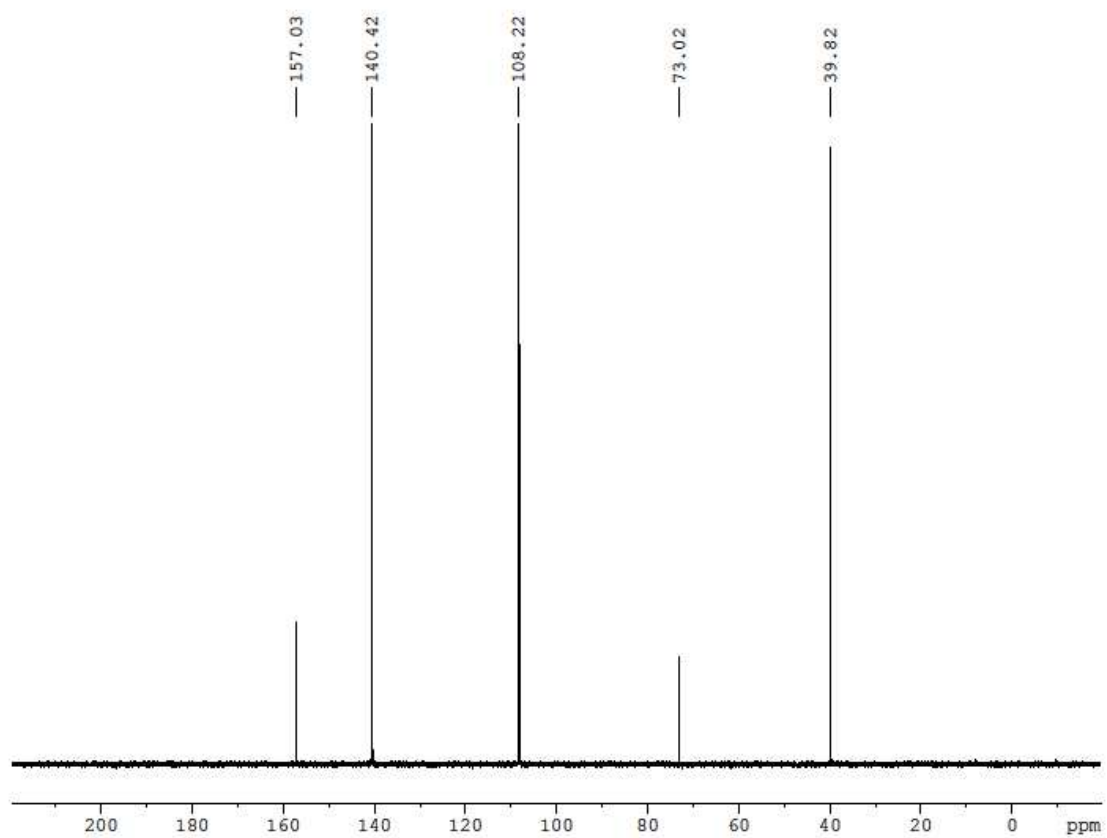

**Figure S11.** Carbon NMR spectrum of compound **3b** in D<sub>2</sub>O.

09120904 #19-67 RT: 0.20-0.69 AV: 49 NL: 5.90E6  
T: FTMS +p ESI Full ms [100.00-1200.00]

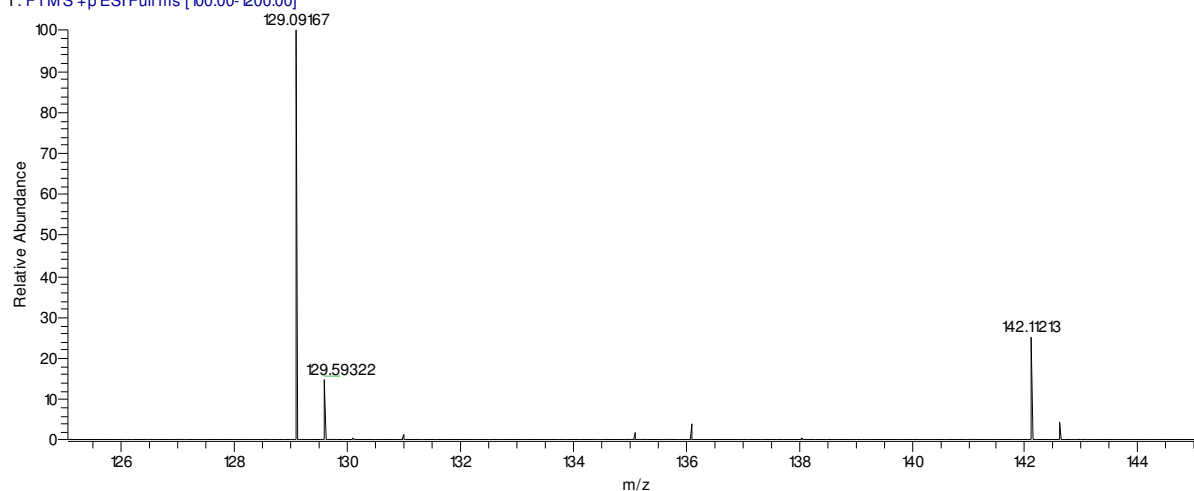

09120904 #19-67 RT: 0.20-0.69 AV: 49 NL: 5.90E6  
T: FTMS +p ESI Full ms [100.00-1200.00]

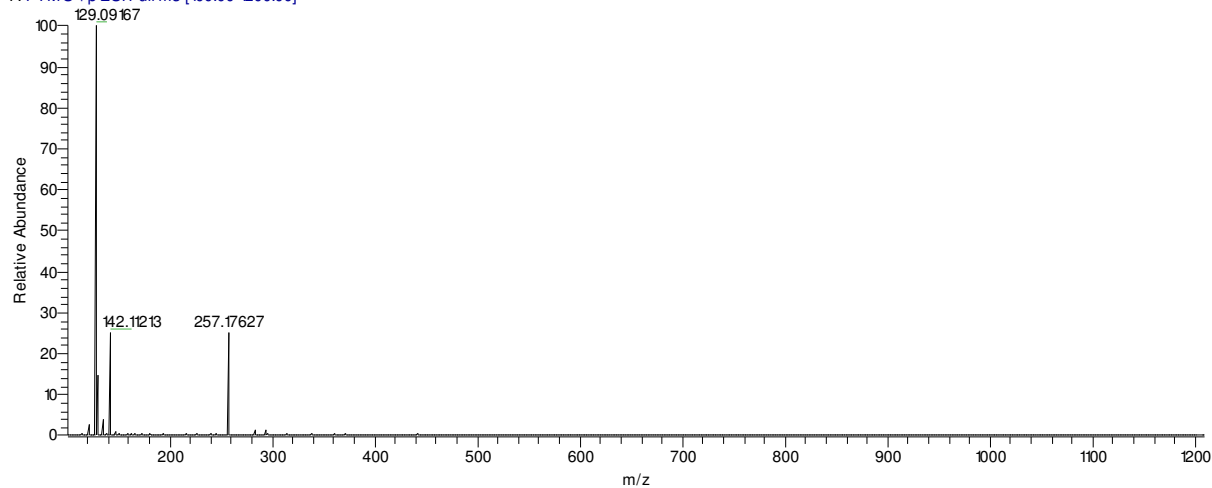

**Figure S12.** ESI (positive mode) HRMS of compound **3b**, showing the peak for the  $M^{2+}$  ion without  $Cl^-$  counterions.

c15h22n4: C15 H22 N4 pa Chrg 2

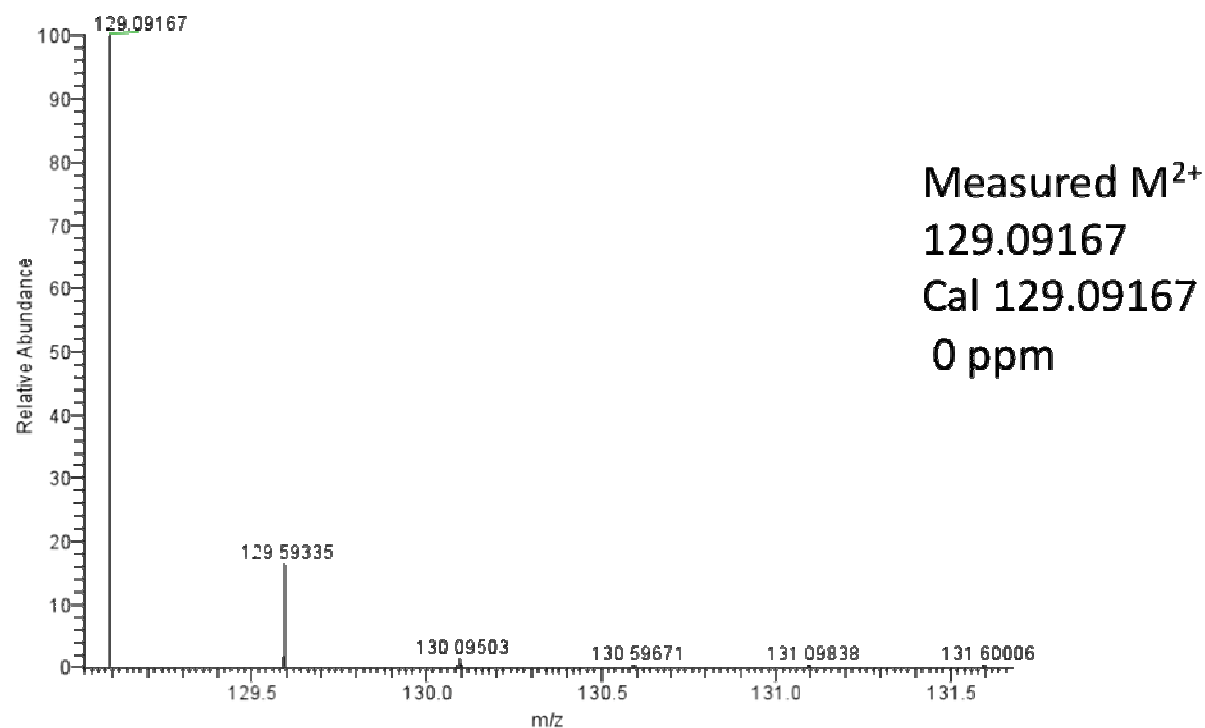

**Figure S13.** Calculated ESI (positive mode) HRMS spectrum for compound **3b**,  $M^{2+}$  ion without  $Cl^-$  counterions.

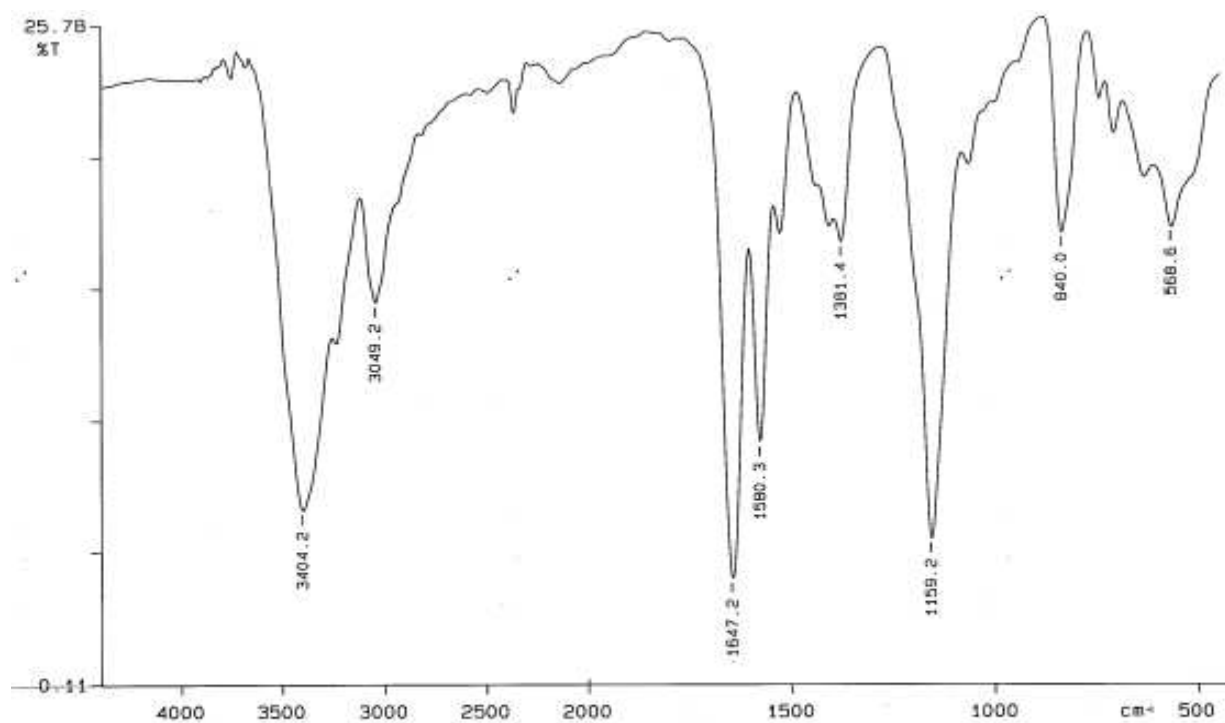

10/04/29 17:25  
X: 16 scans, 4.0cm<sup>-1</sup>, flat, smooth

**Figure S14.** IR spectrum (KBr pellet) of compound **3b** showing vibrations at 3049 cm<sup>-1</sup> (=C-H), ~2950 cm<sup>-1</sup> (-C-H, small shoulder), 1647 cm<sup>-1</sup> (C=C), 1159 cm<sup>-1</sup> (C-N).



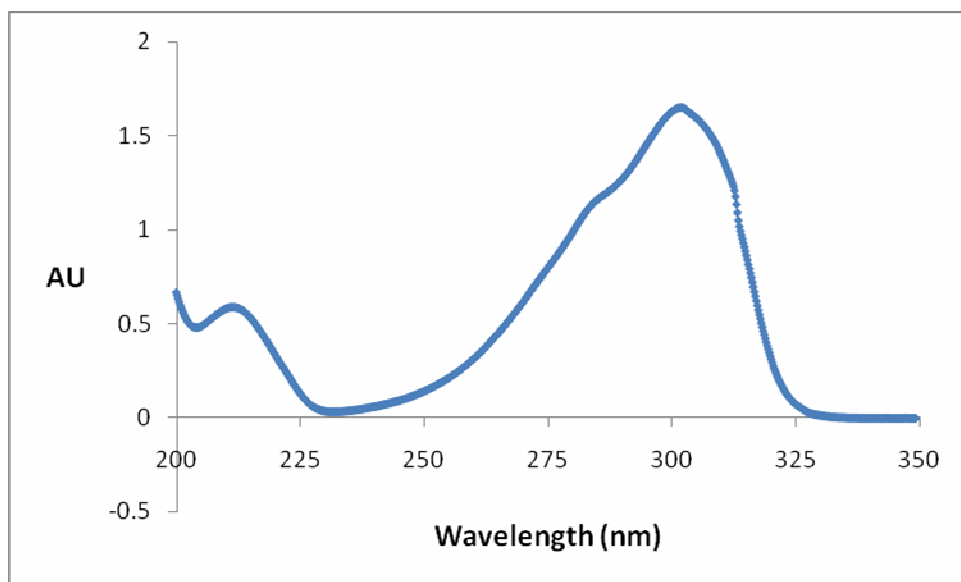

**Figure S15.** UV-Visible spectrum of (3b) in H<sub>2</sub>O.

**(3.2) 1, 1'-Methylenebis(4-t-butylpyridinium) dichloride (3c).**

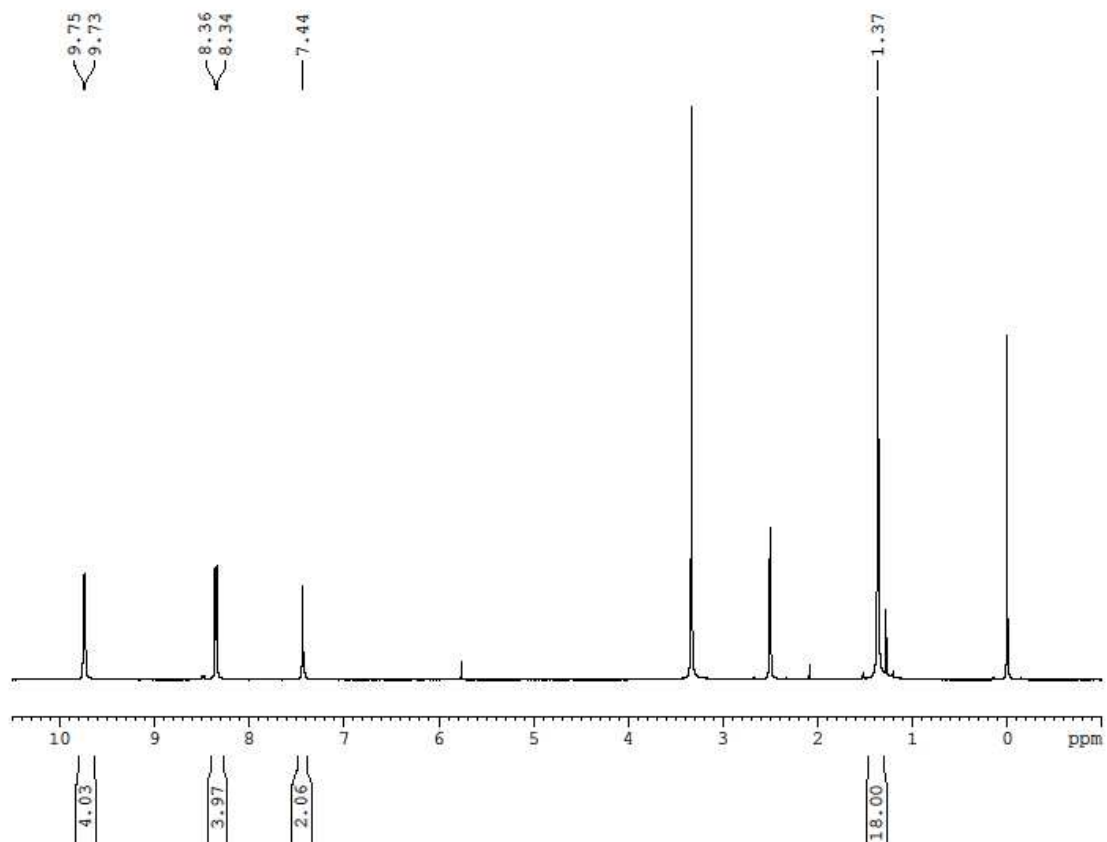

**Figure S16.** Proton NMR spectrum of compound **3c** in DMSO-d<sub>6</sub>. The peaks at 2.5 and 3.4 ppm are DMSO and H<sub>2</sub>O respectively.

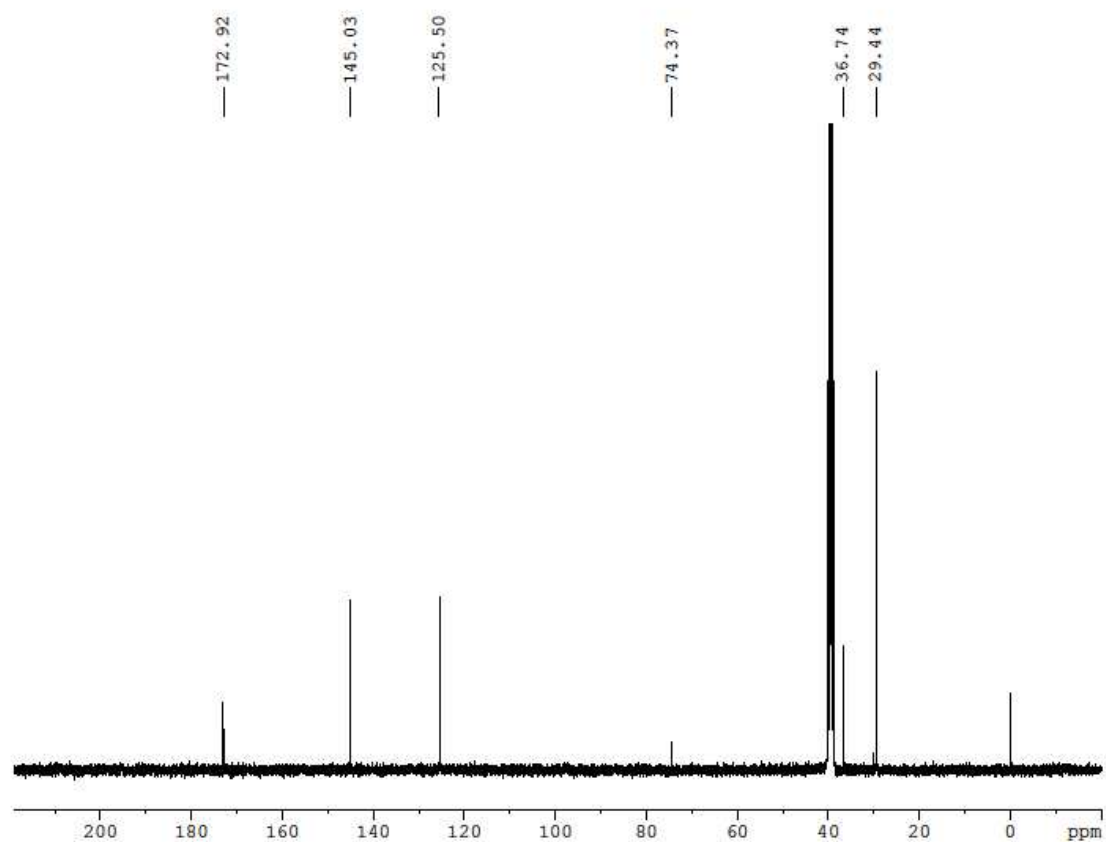

**Figure S17.** Carbon NMR spectrum of compound **3c** in DMSO-d<sub>6</sub>.

09120903 #11-49 RT: 0.10-0.44 AV: 39 NL: 1.16E7  
T: FTMS + p ESI Full ms [100.00-1200.00]

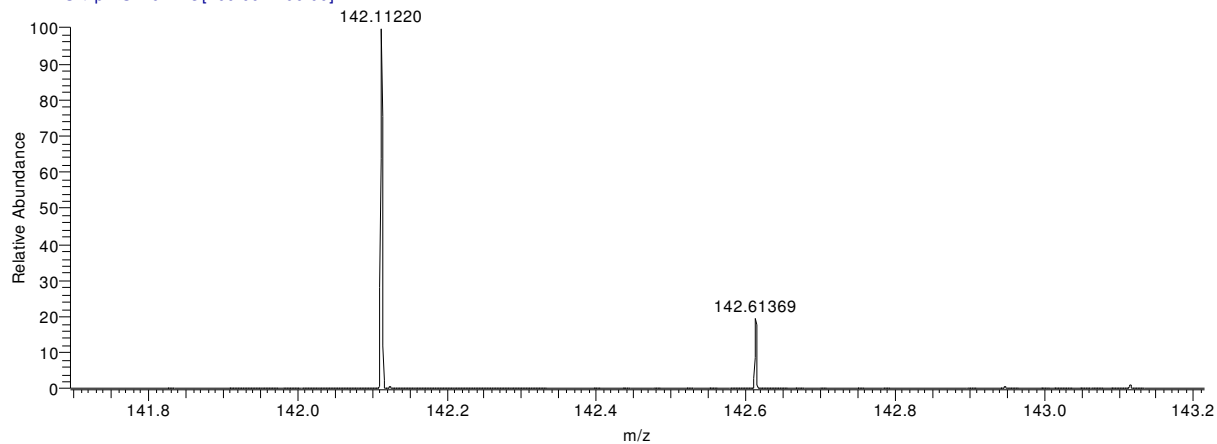

09120903 #11-49 RT: 0.10-0.44 AV: 39 NL: 1.16E7  
T: FTMS + p ESI Full ms [100.00-1200.00]

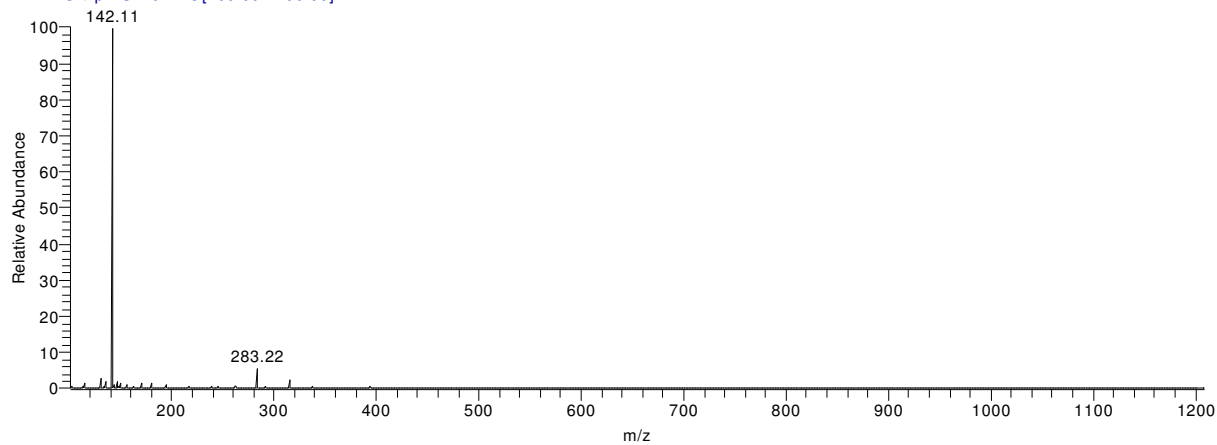

**Figure S18.** ESI (positive mode) HRMS of compound **3c**, showing the peak for the  $M^{2+}$  ion without  $Cl^-$  counterions.

c19h28n2: C19 H28 N2 pa Chrg 2

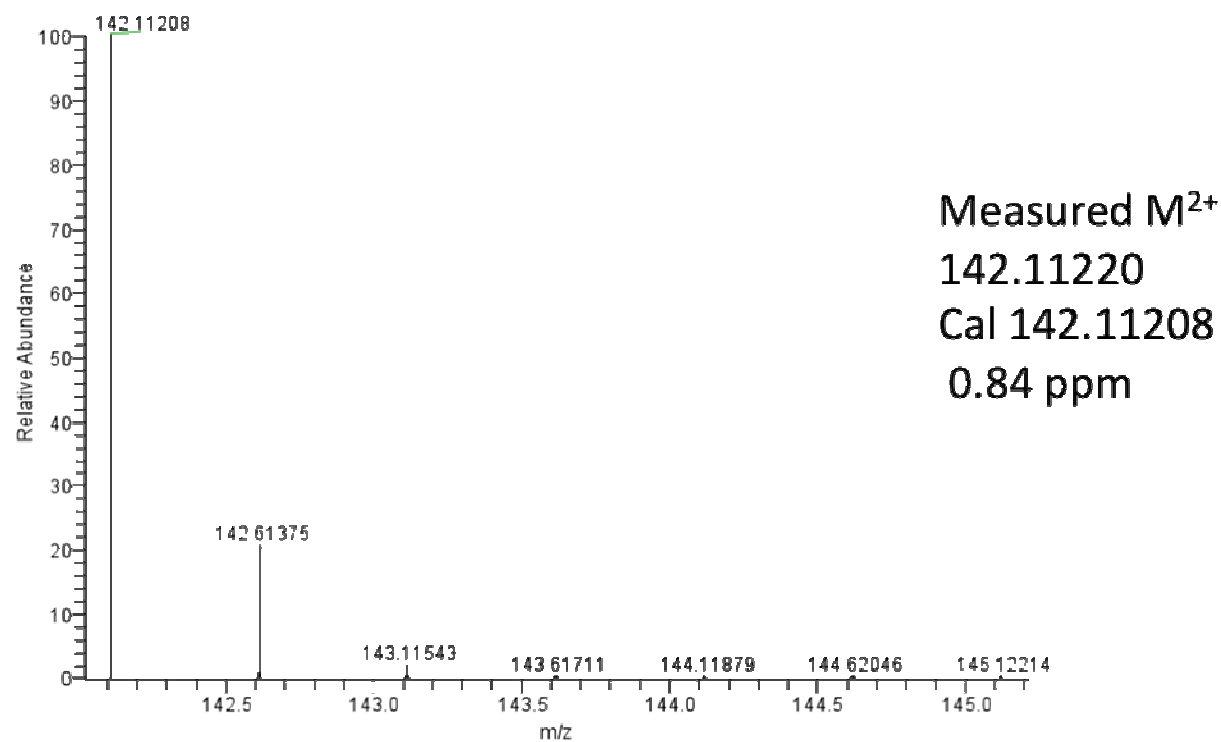

**Figure S19.** Calculated ESI (positive mode) HRMS spectrum for compound **3c**,  $M^{2+}$  ion without  $Cl^-$  counterions.

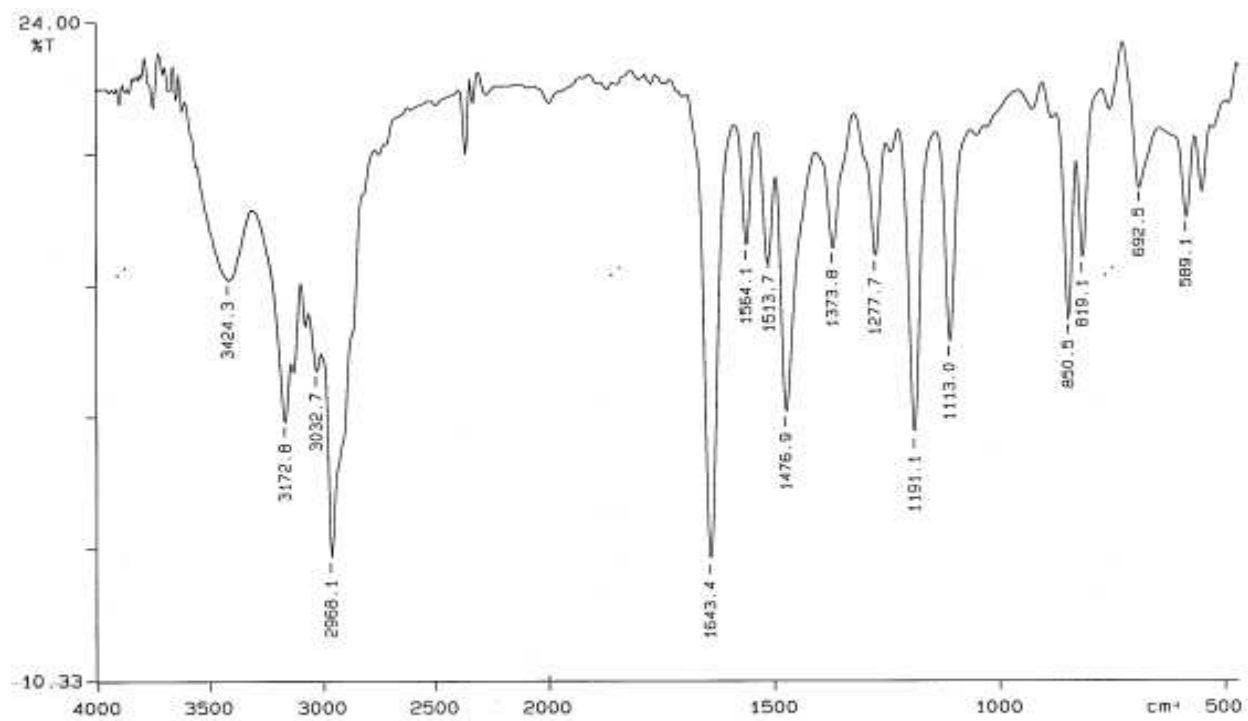

10/05/03 15:40

X: 16 scans, 4.0cm⁻¹, flat, smooth

**Figure S20.** IR spectrum (KBr pellet) of compound **3c** showing vibrations at 3032 cm<sup>-1</sup> (=C-H), 2968 cm<sup>-1</sup> (-C-H), 1643 and 1476 cm<sup>-1</sup> (C=C), 1191 cm<sup>-1</sup> (C-N).

**(3.3) 1, 1'-Methylenebis(4-aminopyridinium) dichloride (3d).**

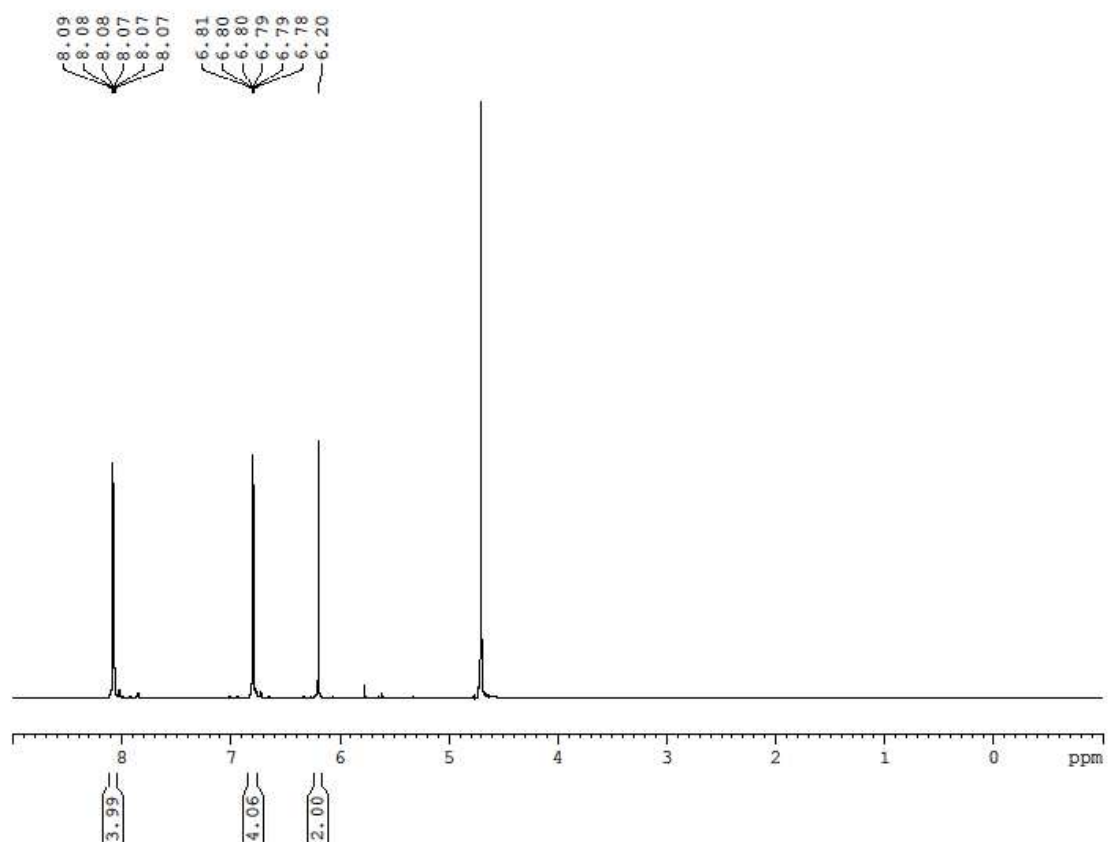

**Figure S21.** Proton NMR spectrum of compound **3d** in D<sub>2</sub>O.

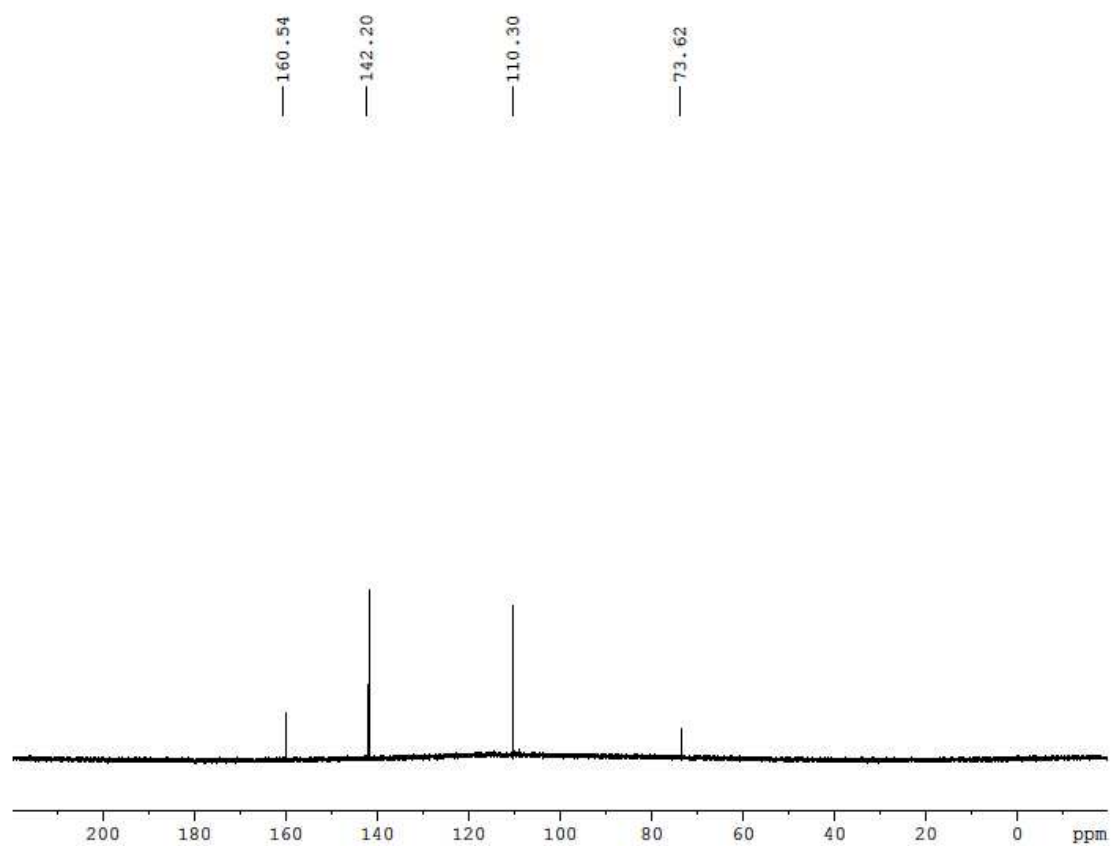

**Figure S22.** Carbon NMR spectrum of compound **3d** in D<sub>2</sub>O.



09120905\_091209110543 # 12-24 RT: 0.14-0.25 AV: 13 NL: 2.56E6  
T: FTMS +p ESI Full ms [50.00-1200.00]

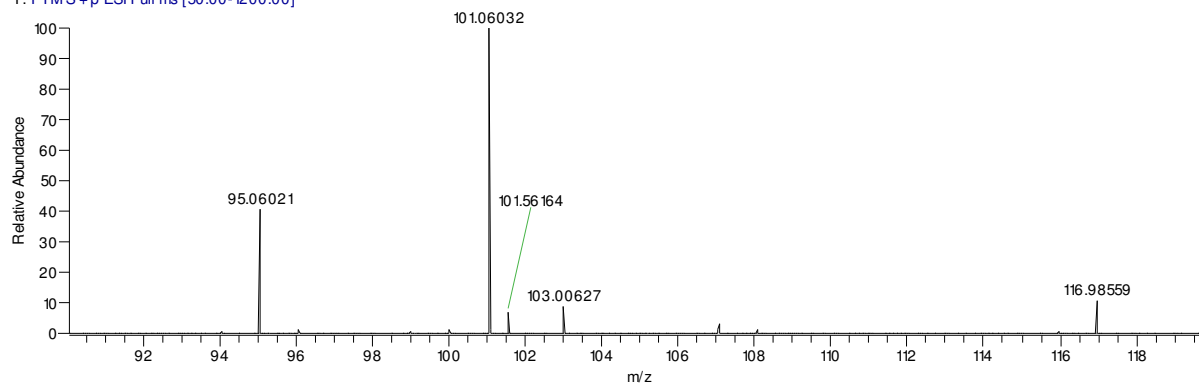

09120905\_091209110543 # 12-24 RT: 0.14-0.25 AV: 13 NL: 2.56E6  
T: FTMS +p ESI Full ms [50.00-1200.00]

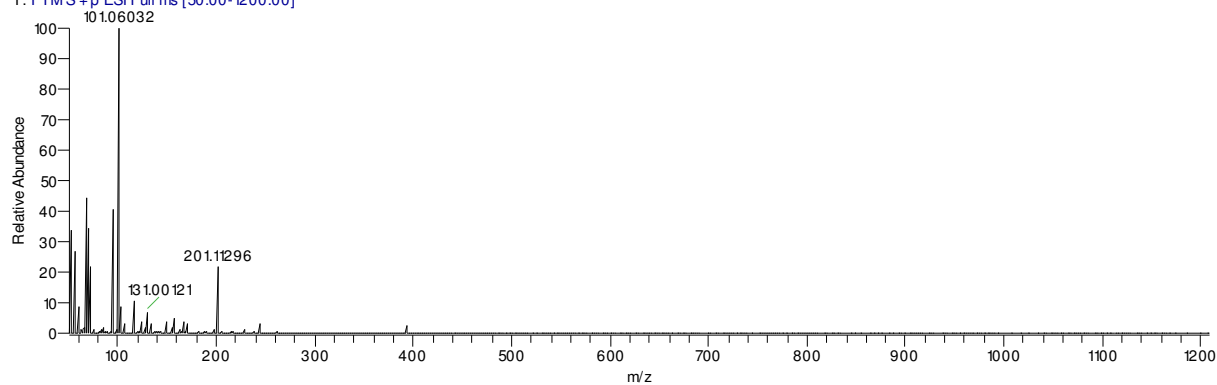

**Figure S23.** ESI (positive mode) HRMS of compound **3d**, showing the peak for the  $M^{2+}$  ion without  $Cl^-$  counterions.

c11h14n4: C11 H14 N4 pa Chrg 2

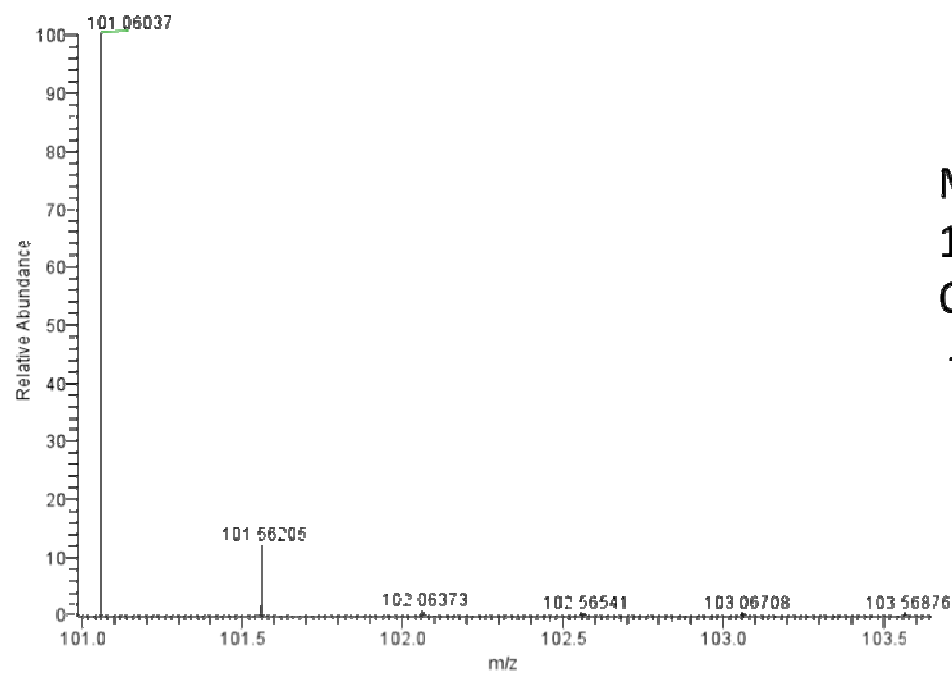

Measured  $M^{2+}$   
101.06032  
Cal 101.06037  
-0.49 ppm

**Figure S24.** Calculated ESI (positive mode) HRMS spectrum for compound **3d**,  $M^{2+}$  ion without  $Cl^-$  counterions.

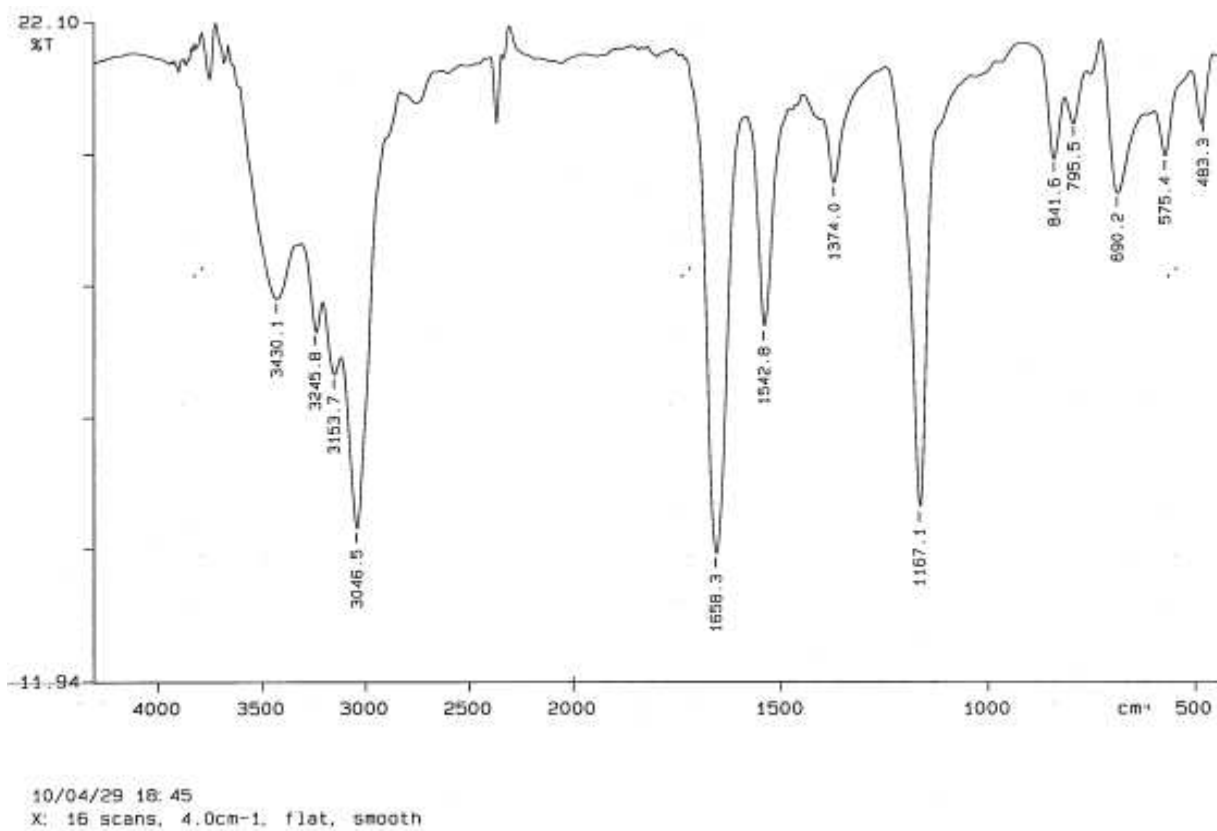

**Figure S25.** IR spectrum (KBr pellet) of compound **3d** showing vibrations at 3245 and 3153 ( $\text{NH}_2$ ), 3046  $\text{cm}^{-1}$  ( $=\text{C-H}$ ), 1658 and 1542  $\text{cm}^{-1}$  ( $\text{C}=\text{C}$ ), 1167  $\text{cm}^{-1}$  ( $\text{C-N}$ ).

**(3.4) 1, 1'-Methylenebis(3-aminopyridinium) dichloride (3e).**

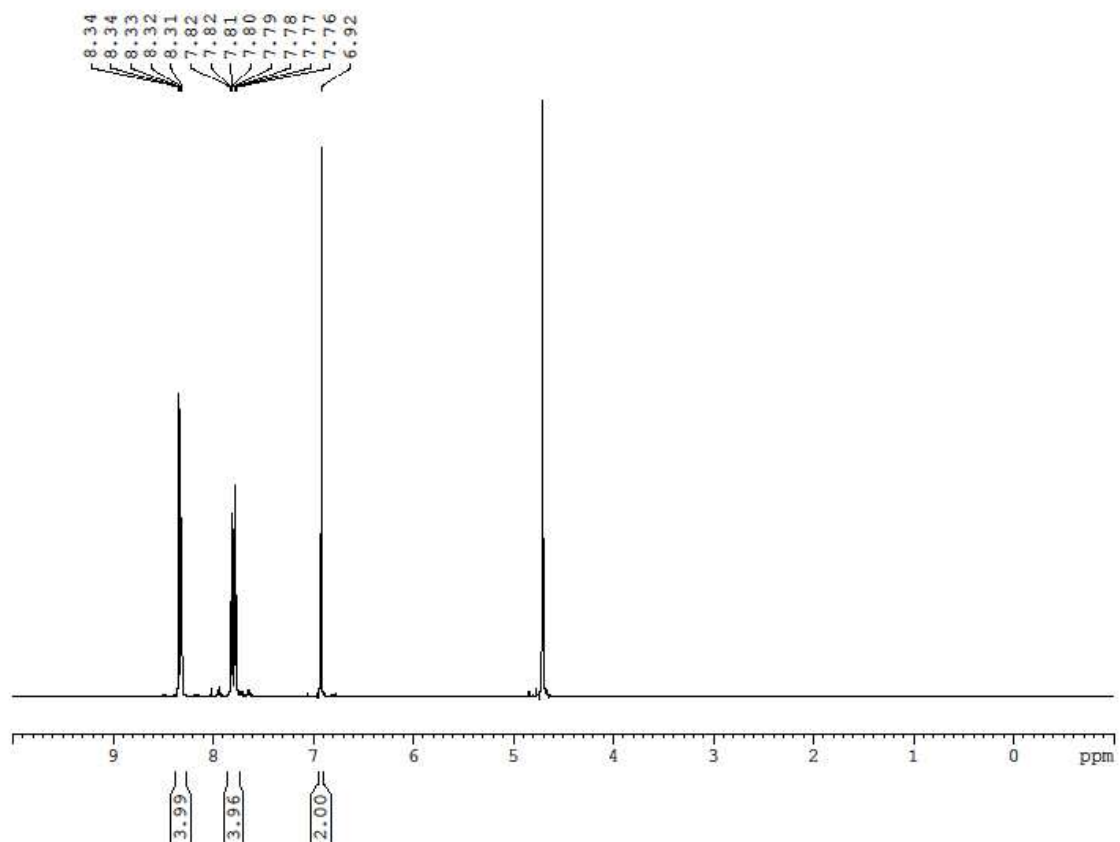

**Figure S26.** Proton NMR spectrum of compound **3e** in D<sub>2</sub>O.

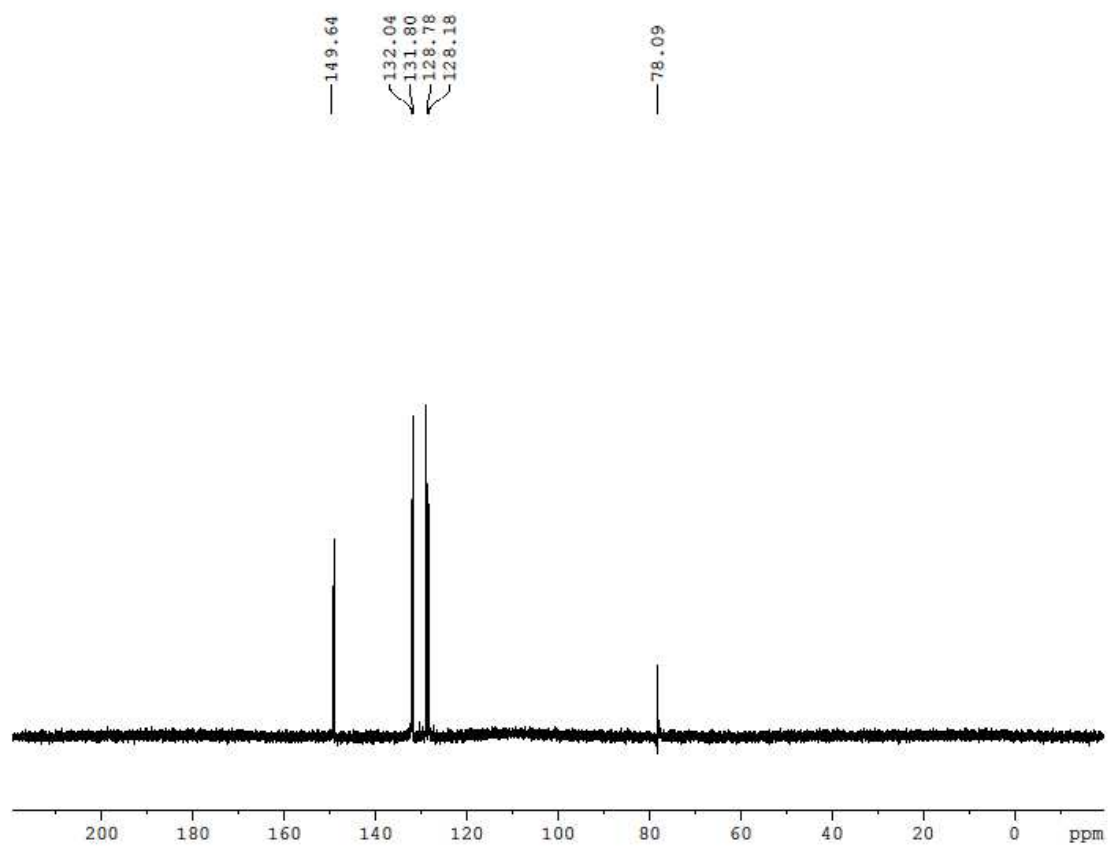

**Figure S27.** Carbon NMR spectrum of compound **3e** in D<sub>2</sub>O.

09120907\_091209110844 # 11-20 RT: 0.13-0.20 AV: 10 NL: 1.06E7  
T: FTMS + p ESI Full ms [50.00-1200.00]

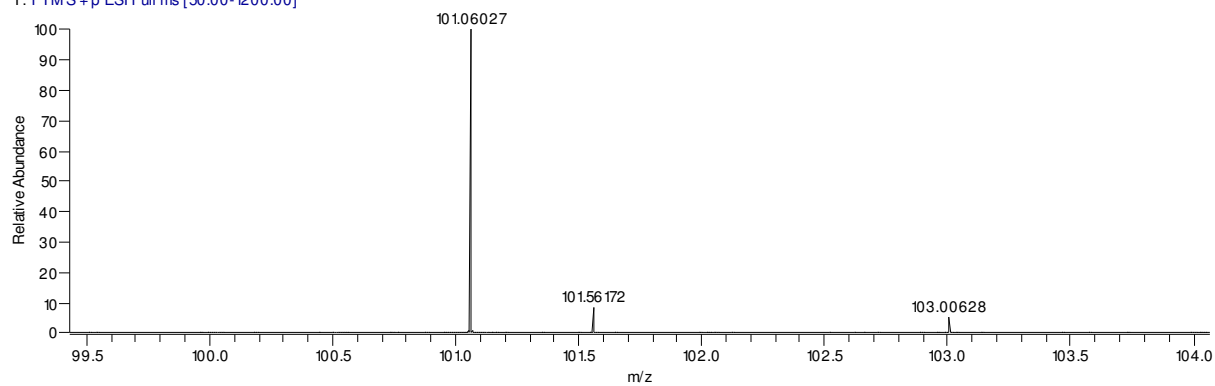

09120907\_091209110844 # 11-20 RT: 0.13-0.20 AV: 10 NL: 1.06E7  
T: FTMS + p ESI Full ms [50.00-1200.00]

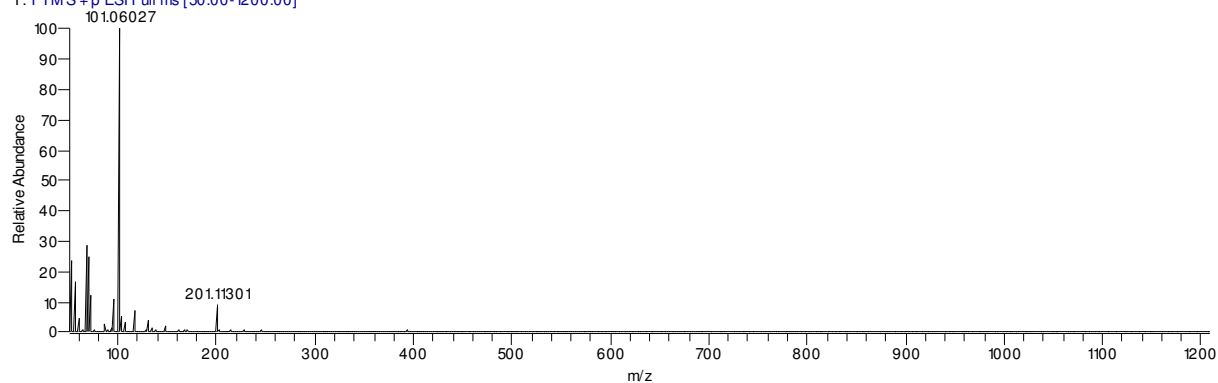

**Figure S28.** ESI (positive mode) HRMS of compound **3e**, showing the peak for the  $M^{2+}$  ion without  $Cl^-$  counterions.

c11h14n4: C11 H14 N4 pa Chrg 2

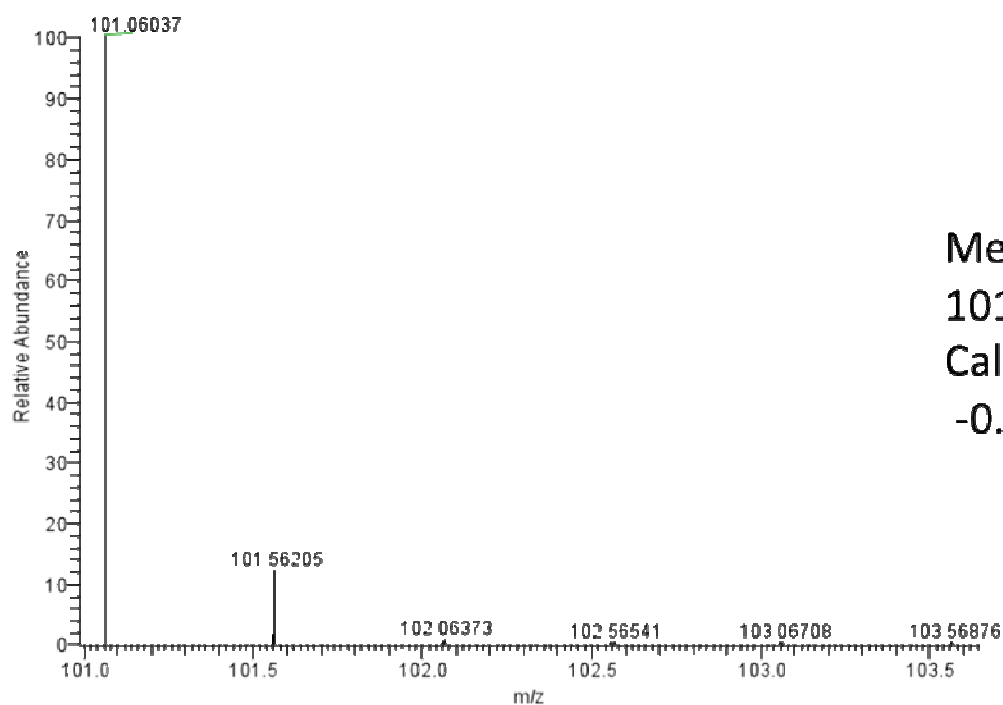

Measured  $M^{2+}$   
101.06027  
Cal 101.06037  
-0.99 ppm

**Figure S29.** Calculated ESI (positive mode) HRMS spectrum for compound **3e**,  $M^{2+}$  ion without  $Cl^-$  counterions.

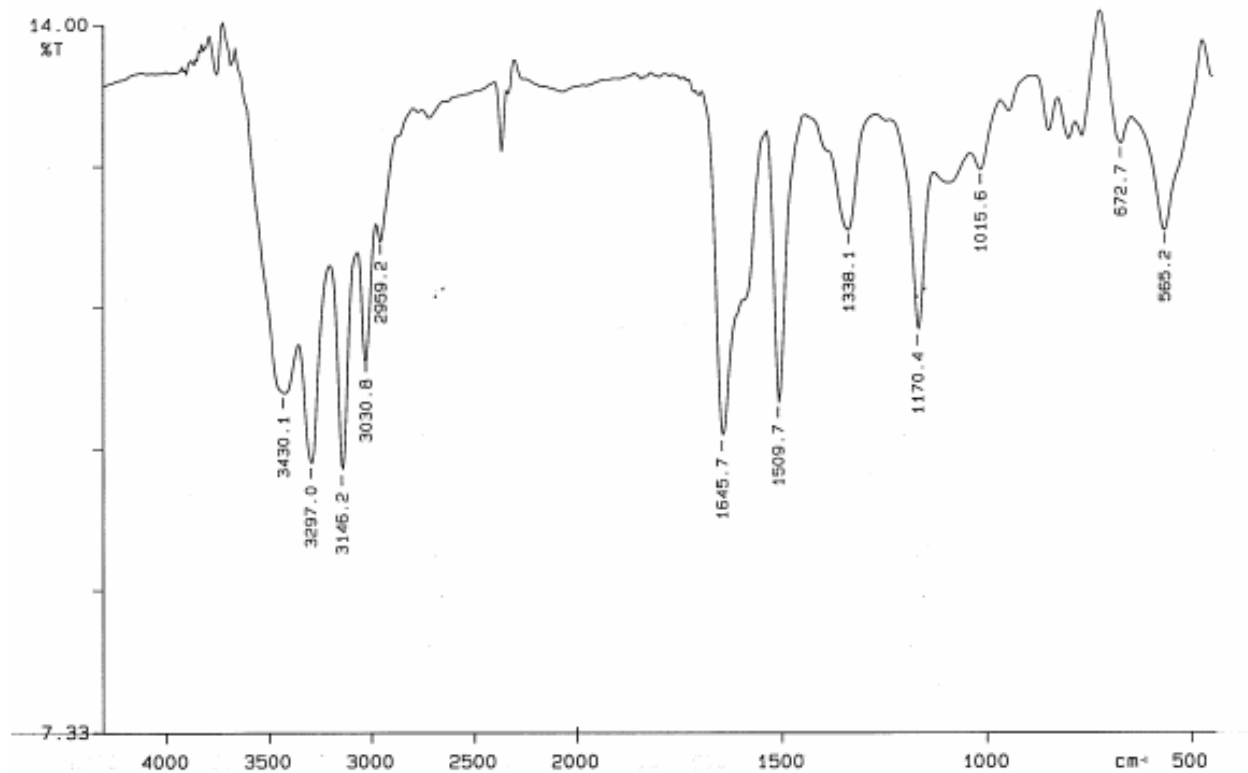

10/04/29 19:32  
X: 16 scans, 4.0cm-1, flat, smooth

**Figure S30.** IR spectrum (KBr pellet) of compound **3e** showing vibrations at 3297 and 3146  $\text{cm}^{-1}$  ( $\text{NH}_2$ ) 3030  $\text{cm}^{-1}$  ( $=\text{C-H}$ ), 2959  $\text{cm}^{-1}$  ( $-\text{C-H}$ ), 1645 and 1509  $\text{cm}^{-1}$  ( $\text{C}=\text{C}$ ), 1170  $\text{cm}^{-1}$  ( $\text{C-N}$ ).



**(3.5) 1, 1'-Methylenebis(4- $\gamma$ -pyridylpyridinium) dichloride (3f).**

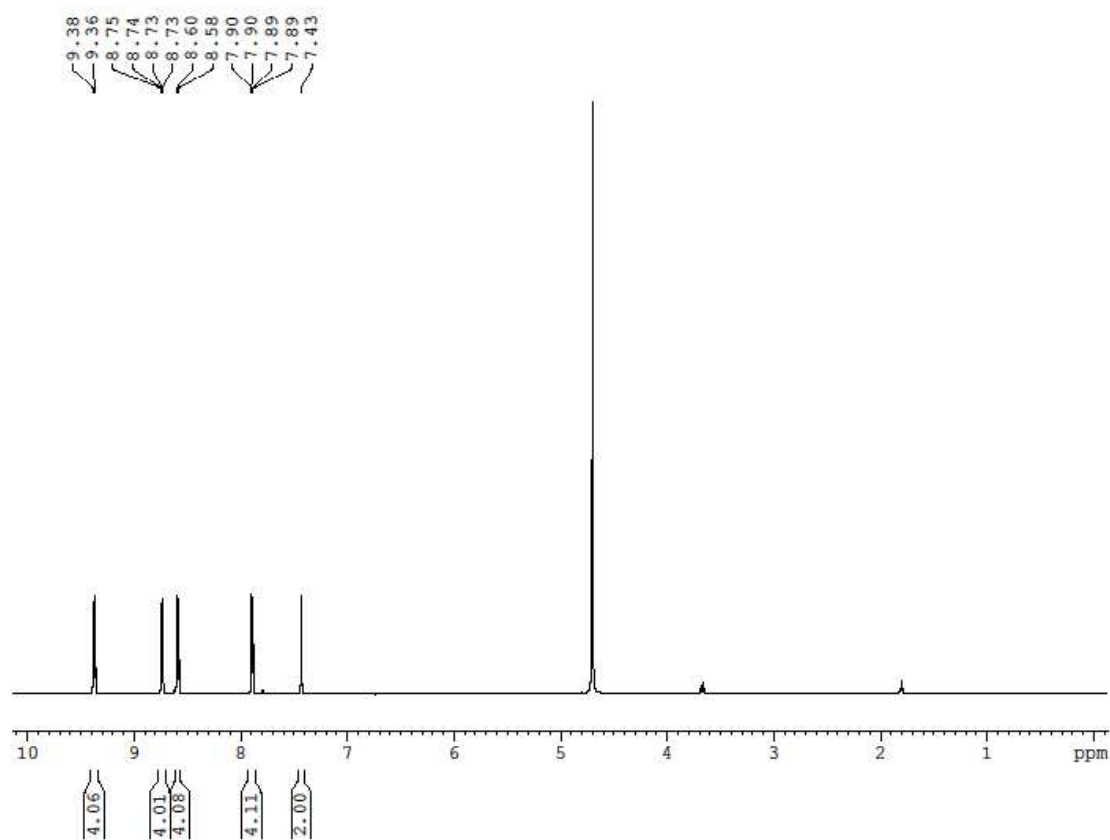

**Figure S31.** Proton NMR spectrum of compound **3f** in D<sub>2</sub>O. Peaks at 1.76 and 3.60 ppm are residual solvent peaks (THF).

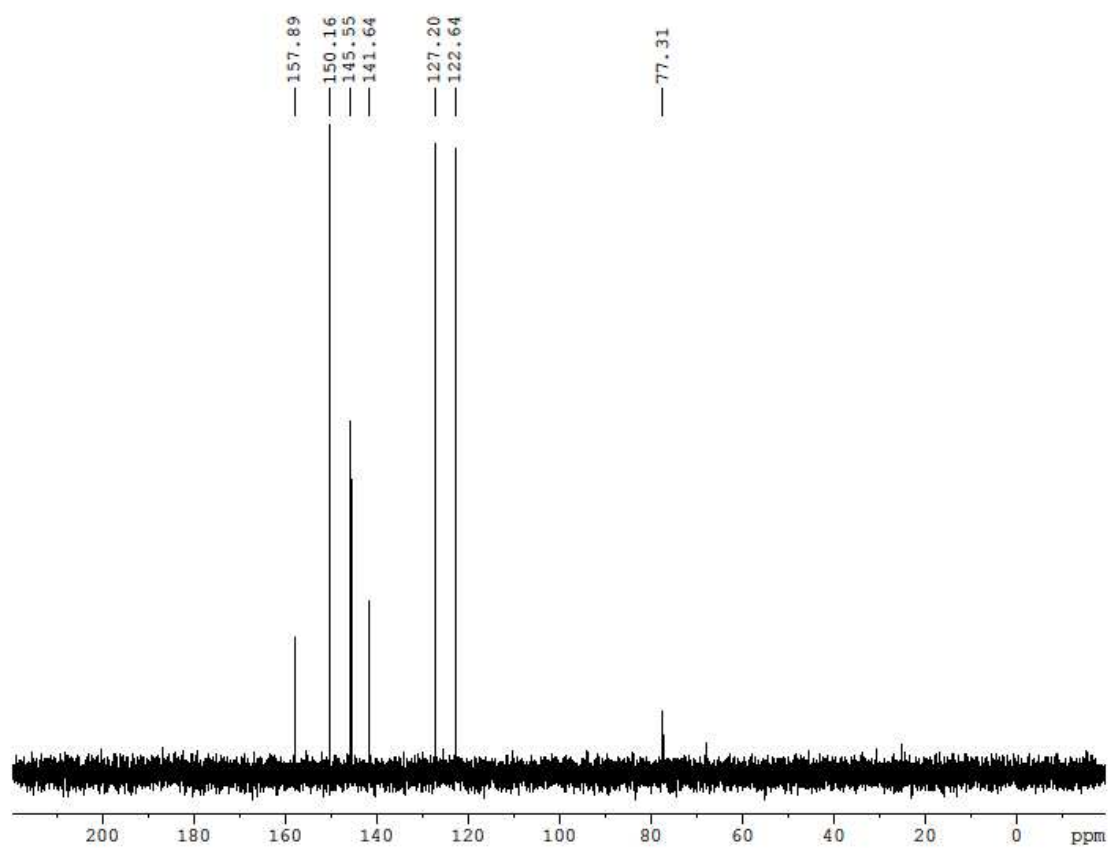

**Figure S32.** Carbon NMR spectrum of compound **3f** in D<sub>2</sub>O.

10010403 #10-36 RT: 0.11-0.32 AV: 27 NL: 4.58E7  
T: FTMS + p ESI Full ms [50.00-1200.00]

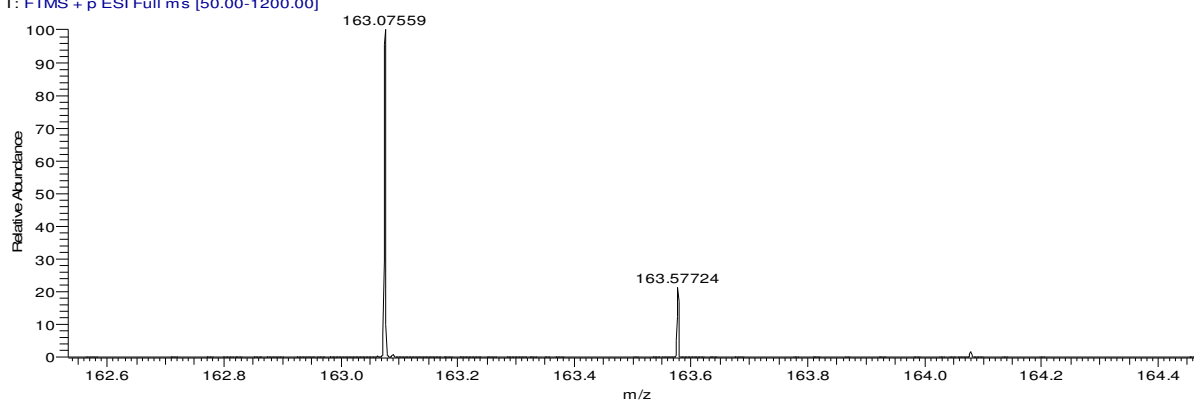

10010403 #10-36 RT: 0.11-0.32 AV: 27 NL: 4.58E7  
T: FTMS + p ESI Full ms [50.00-1200.00]

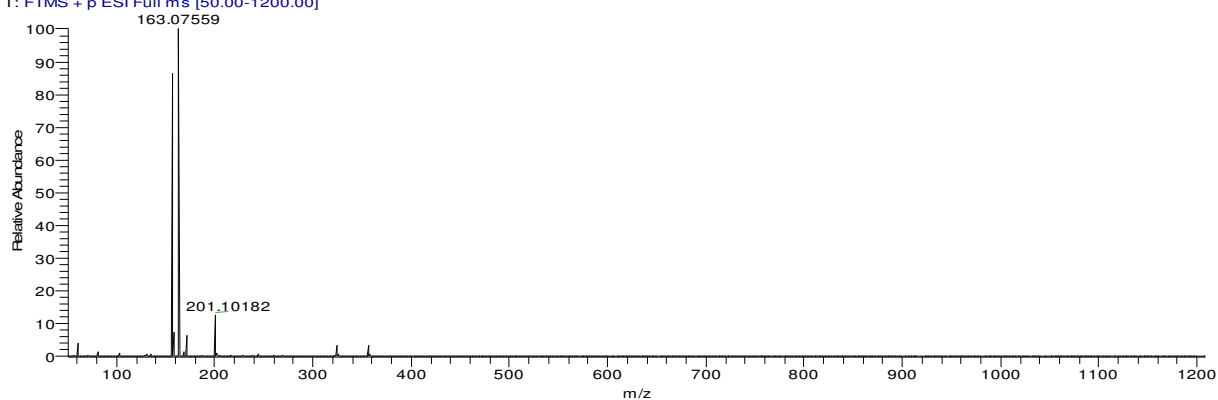

**Figure S33.** ESI (positive mode) HRMS of compound **3f**, showing the peak for the  $M^{2+}$  ion without  $Cl^-$  counterions.

c21h18n4: C21 H18 N4 pa Chrg 2

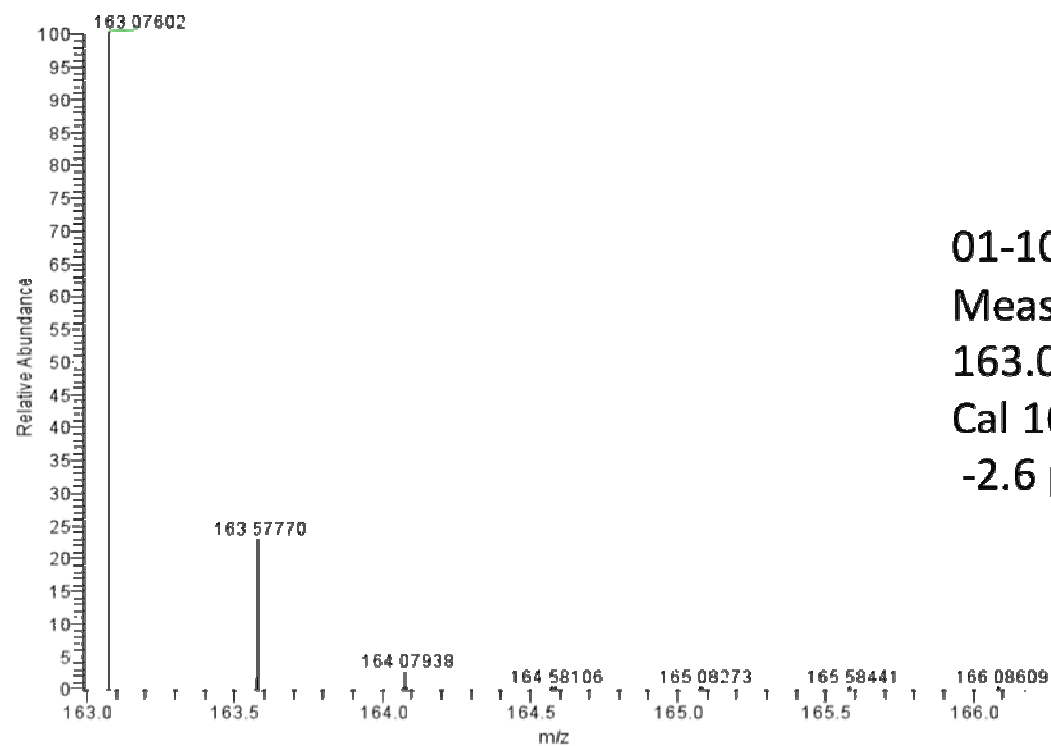

01-10  
Measured  $M^{2+}$   
163.07559  
Cal 163.07602  
-2.6 ppm

**Figure S34.** Calculated ESI (positive mode) HRMS spectrum for compound **3f**,  $M^{2+}$  ion without  $Cl^-$  counterions.

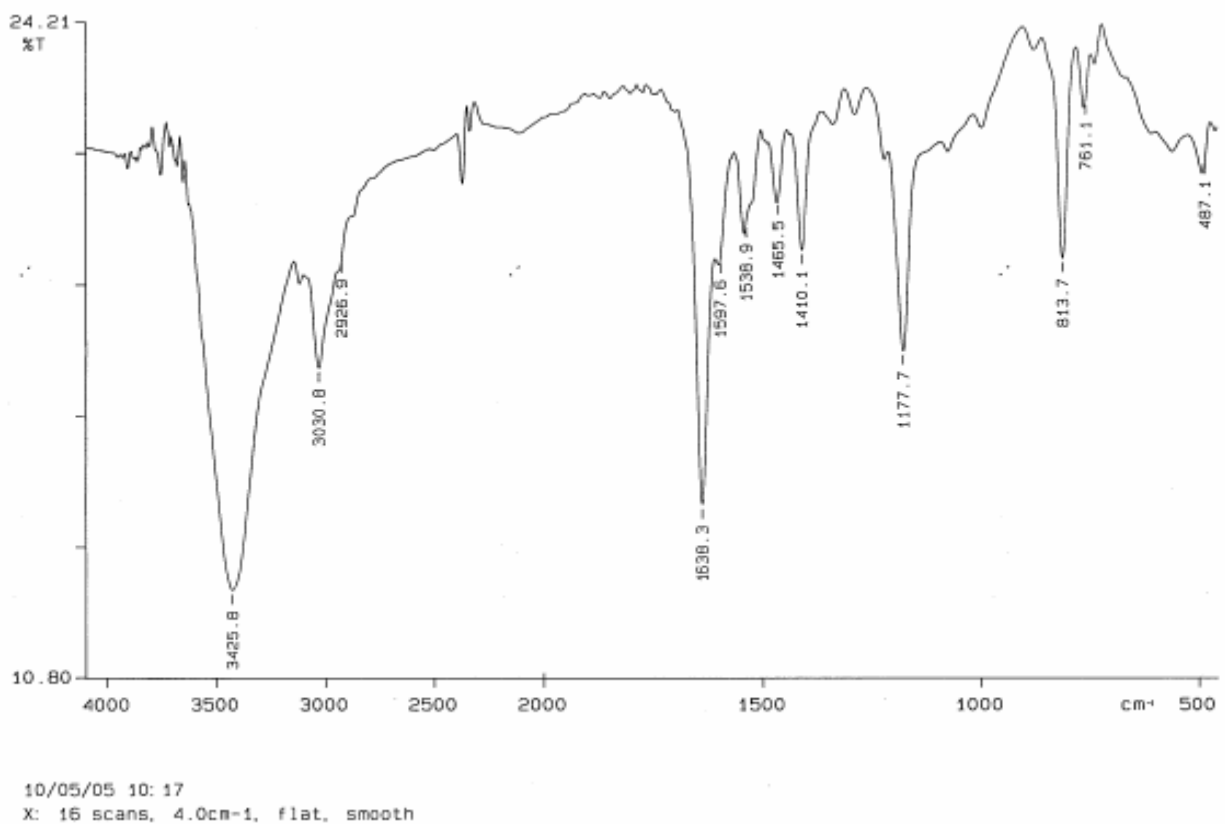

**Figure S35.** IR spectrum (KBr pellet) of compound **3e** showing vibrations at 3030  $\text{cm}^{-1}$  ( $=\text{C-H}$ ), 2926  $\text{cm}^{-1}$  ( $-\text{C-H}$ ), 1638 and 1538  $\text{cm}^{-1}$  ( $\text{C}=\text{C}$ ), 1177  $\text{cm}^{-1}$  ( $\text{C-N}$ ).

#### (4) Kinetic Plots and Calculations

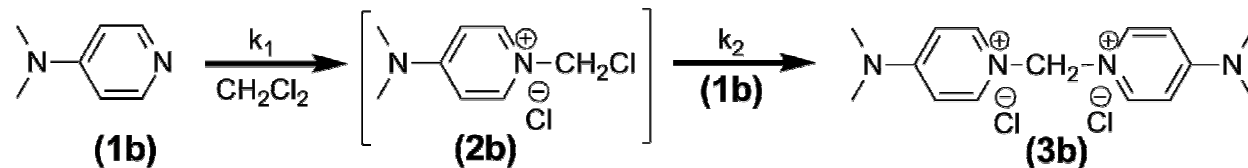

**Figure S36.** Proposed mechanism for the reaction of DCM and DMAP.

##### (4.1) Kinetic plots for the overall process $2(1b) + \text{DCM} \rightarrow 3b$ runs 1-4.

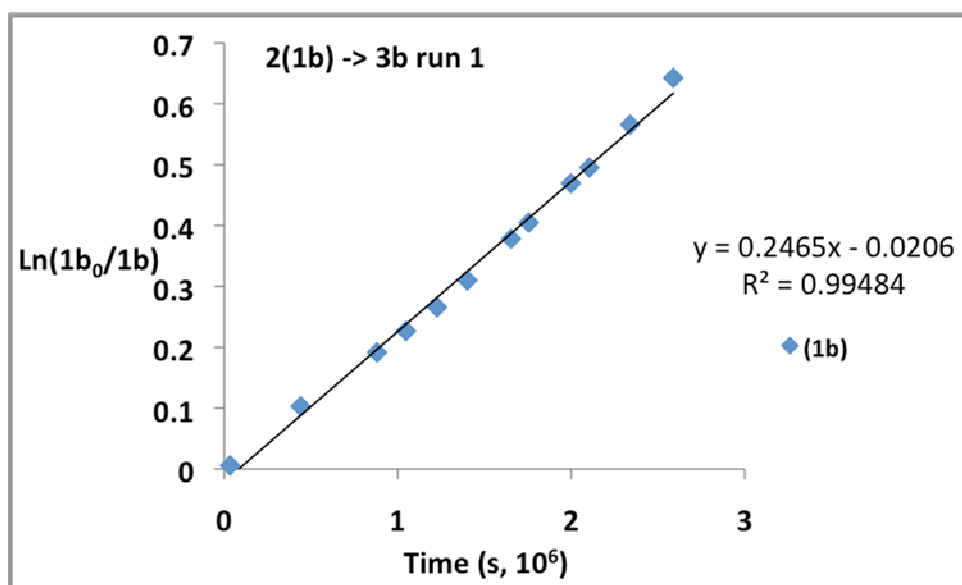

**Figure S37.** Pseudo 1<sup>st</sup> order kinetic plot for the reaction  $2(1b) + \text{DCM (excess)} \rightarrow 3b$  run 1. The slope of the plot is used to calculate the 2<sup>nd</sup> order rate constant  $k_1$ .

Since in the overall process intermediate **2b** is not isolated or observed we estimate  $k_2 \gg k_1$  and that the observed rate constant is approximately equal to the 2<sup>nd</sup> order rate constant for the first step.

$$\text{Slope} = 2k_1 * [\text{DCM}]_0$$

$$k_1 = \text{slope} / 2[\text{DCM}]_0 \quad \text{initial concentration of DCM is 5.04 M}$$

$$k_1 (\text{run 1}) = 2.47 \times 10^{-8} \text{ M}^{-1}\text{s}^{-1}$$

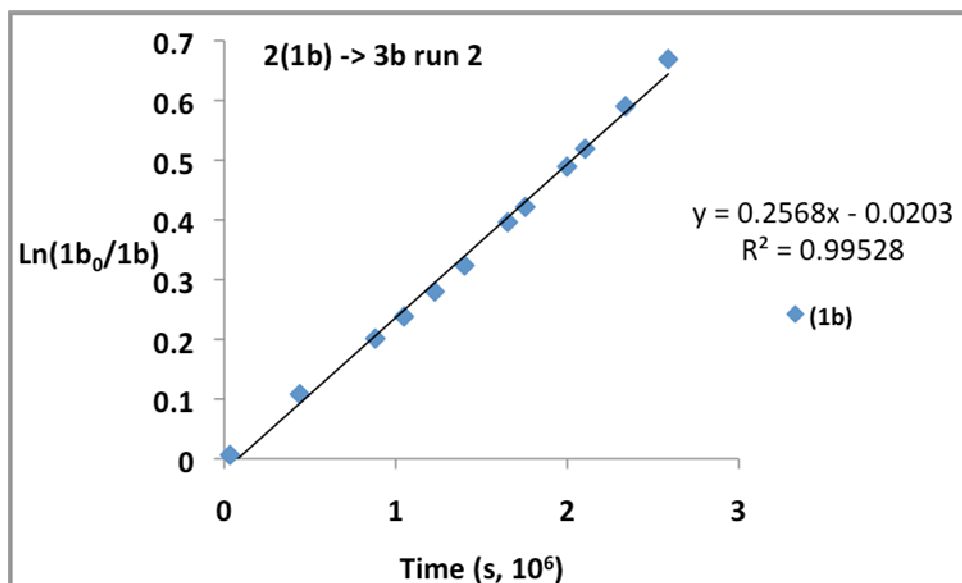

**Figure S38.** Pseudo 1<sup>st</sup> order kinetic plot for the reaction **2(1b) + DCM (excess) → 3b** (run 2). The slope of the plot is used to calculate the 2<sup>nd</sup> order rate constant  $k_1$ .

$$k_1 \text{ (run 2)} = 2.57 \times 10^{-8} \text{ M}^{-1}\text{s}^{-1}$$

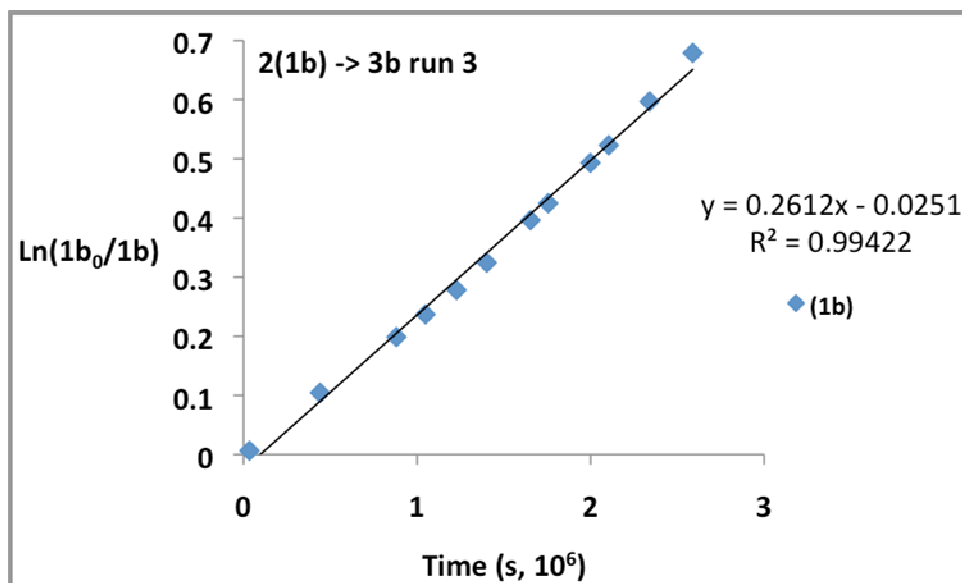

**Figure S39.** Pseudo 1<sup>st</sup> order kinetic plot for the reaction **2(1b) + DCM (excess) → 3b** (run 3). The slope of the plot is used to calculate the 2<sup>nd</sup> order rate constant  $k_1$ .

$$k_1 \text{ (run 3)} = 2.61 \times 10^{-8} \text{ M}^{-1}\text{s}^{-1}$$

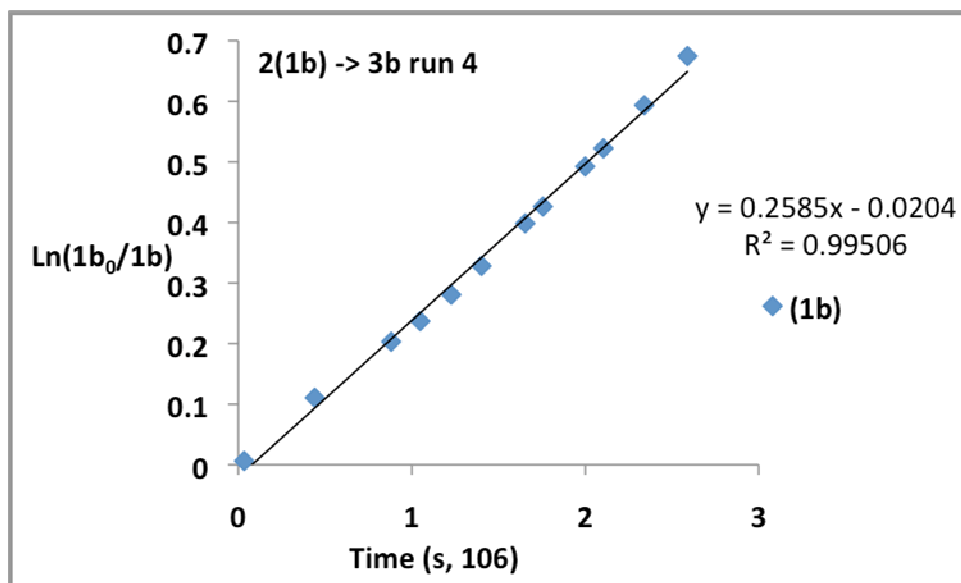

**Figure S40.** Pseudo 1<sup>st</sup> order kinetic plot for the reaction **2(1b) + DCM (excess) → 3b** (run 4). The slope of the plot is used to calculate the 2<sup>nd</sup> order rate constant  $k_1$ .

$$k_1 \text{ (run 4)} = 2.54 \times 10^{-8} \text{ M}^{-1}\text{s}^{-1}$$

$$k_1 \text{ (ave)} = 2.56(\pm 0.06) \times 10^{-8} \text{ M}^{-1}\text{s}^{-1}$$



(4.2) Kinetic plots for the second step reaction  $1b + 2b \rightarrow 3b$  runs 1-4.

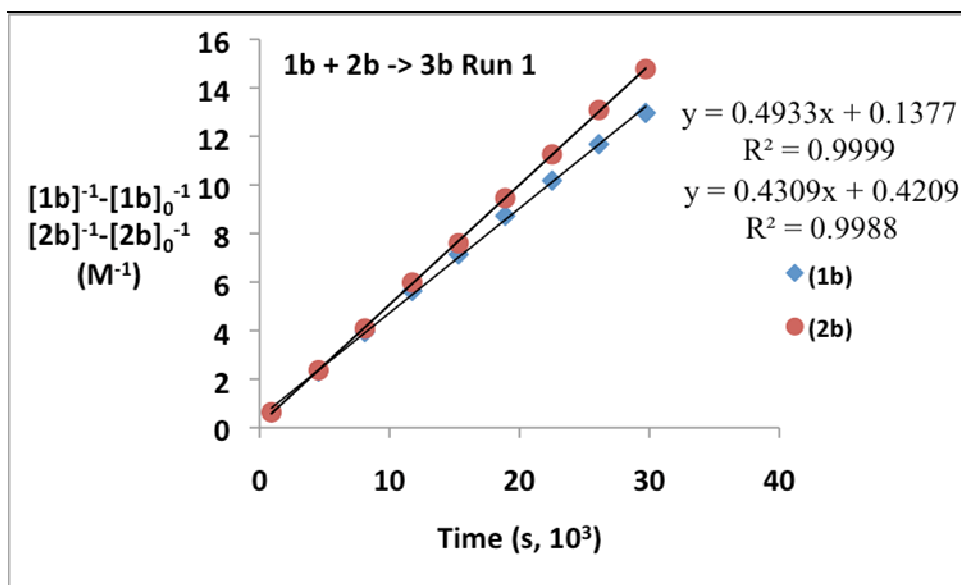

**Figure S41.** 2<sup>nd</sup> order kinetic plot for the reaction  $1b + 2b \rightarrow 3b$  (run 1). The slope of the plot is the 2<sup>nd</sup> order rate constant for the second step reaction. The slope in terms of both **1b** and intermediate **2b** are shown.

$$k_{2(1b)} (\text{run 1}) = 4.31 \times 10^{-4} M^{-1}s^{-1}$$

$$k_{2(2b)} (\text{run 1}) = 4.93 \times 10^{-4} M^{-1}s^{-1}$$

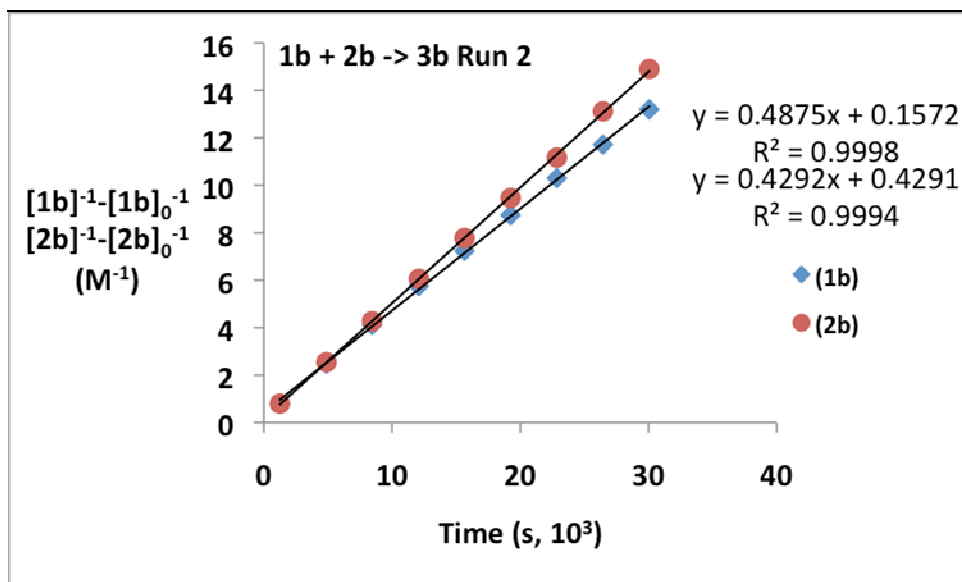

**Figure S42.** 2<sup>nd</sup> order kinetic plot for the reaction **1b + 2b → 3b** (run 2). The slope of the plot is the 2<sup>nd</sup> order rate constant for the second step reaction. The slope in terms of both **1b** and intermediate **2b** are shown.

$$k_{2(1b)} (\text{run 2}) = 4.29 \times 10^{-4} \text{ M}^{-1}\text{s}^{-1}$$

$$k_{2(2b)} (\text{run 2}) = 4.88 \times 10^{-4} \text{ M}^{-1}\text{s}^{-1}$$

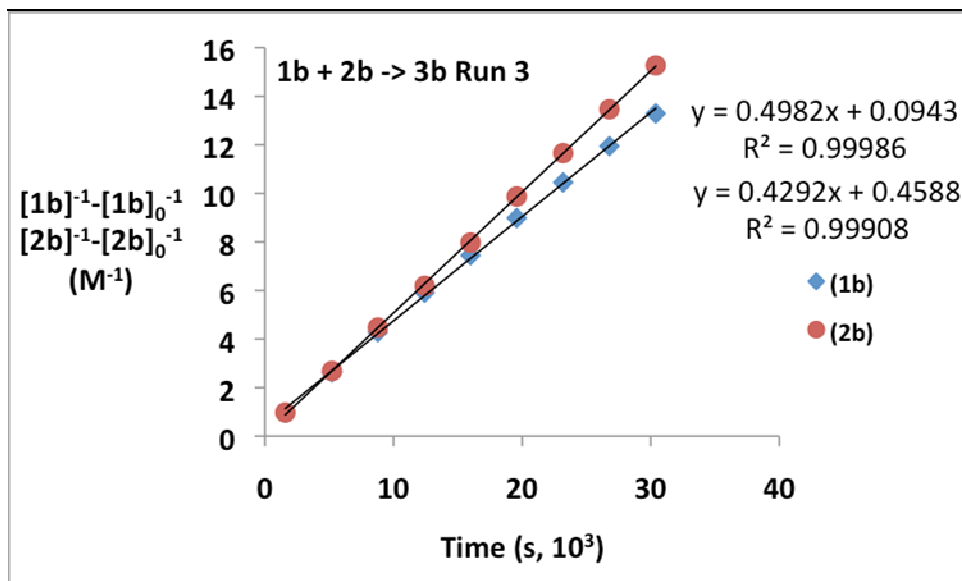

**Figure S43.** 2<sup>nd</sup> order kinetic plot for the reaction **1b + 2b → 3b** (run 3). The slope of the plot is the 2<sup>nd</sup> order rate constant for the second step reaction. The slope in terms of both **1b** and intermediate **2b** are shown.

$$k_{2(1b)} (\text{run 3}) = 4.29 \times 10^{-4} \text{ M}^{-1}\text{s}^{-1}$$

$$k_{2(2b)} (\text{run 3}) = 4.98 \times 10^{-4} \text{ M}^{-1}\text{s}^{-1}$$

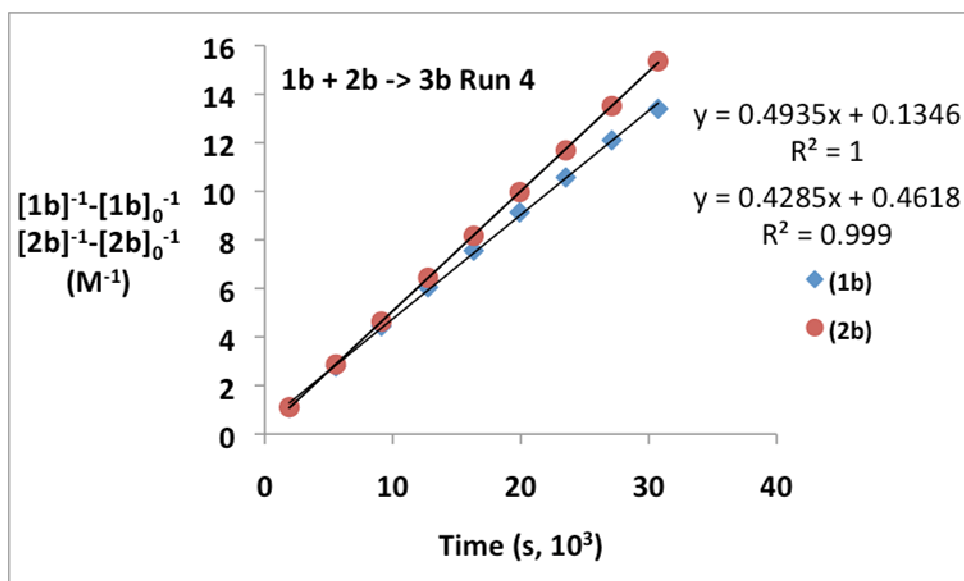

**Figure S44.** 2<sup>nd</sup> order kinetic plot for the reaction **1b + 2b → 3b** (run 4). The slope of the plot is the 2<sup>nd</sup> order rate constant for the second step reaction. The slope in terms of both **1b** and intermediate **2b** are shown.

$$k_{2(1b)} (\text{run 4}) = 4.29 \times 10^{-4} \text{ M}^{-1}\text{s}^{-1}$$

$$k_{2(2b)} (\text{run 4}) = 4.94 \times 10^{-4} \text{ M}^{-1}\text{s}^{-1}$$

$$k_{2(1b)} (\text{ave}) = 4.29(\pm 0.01) \times 10^{-4} \text{ M}^{-1}\text{s}^{-1}$$

$$k_{2(2b)} (\text{ave}) = 4.93(\pm 0.04) \times 10^{-4} \text{ M}^{-1}\text{s}^{-1}$$

**Reaction rate comparison between the 1<sup>st</sup> and 2<sup>nd</sup> step.**

$$k_{2(1b)} / k_1 = \sim 17,000$$

$$k_{2(2b)} / k_1 = \sim 20,000$$

**Intermediate concentration [2b] at the steady state.**

Based on the steady state approximation:  $k_1[1b][\text{DCM}]_0 = k_2[1b][2b]$ .

$$(k_1 / k_{2(1b)})[5.04]_0 = [2b] = 2.9 \times 10^{-4} \text{ M at steady state}$$

$$(k_1 / k_{2(2b)})[5.04]_0 = [2b] = 2.5 \times 10^{-4} \text{ M at steady state}$$

$$[2b] = 2.9 \times 10^{-4} \text{ M at steady state}$$

(4.3) Full  $^1\text{H}$  NMR spectra for the overall reaction and for the 2<sup>nd</sup> step reaction

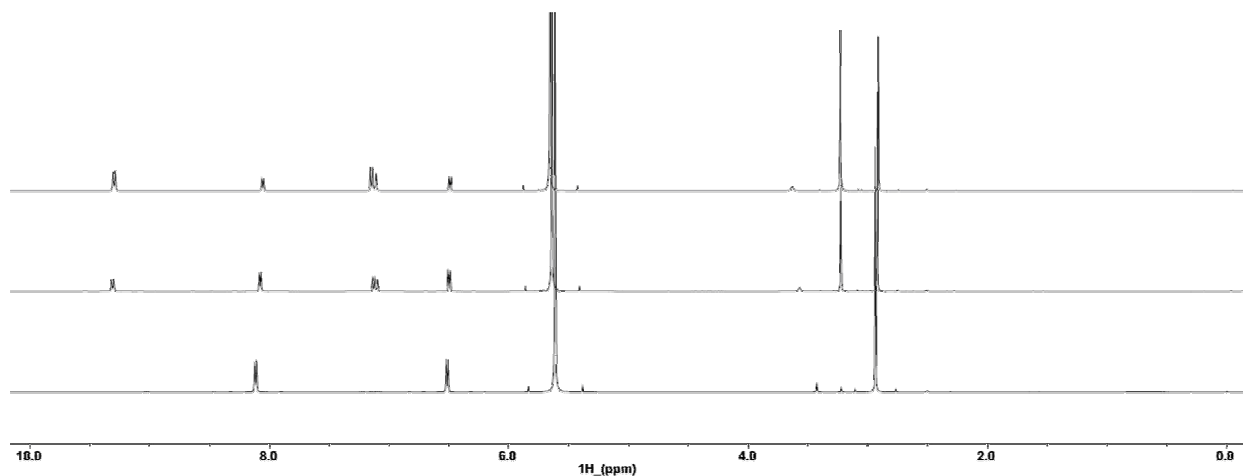

**Figure S45.** 400 MHz proton NMR spectra for the overall reaction between DMAP and DCM to form **3b**.

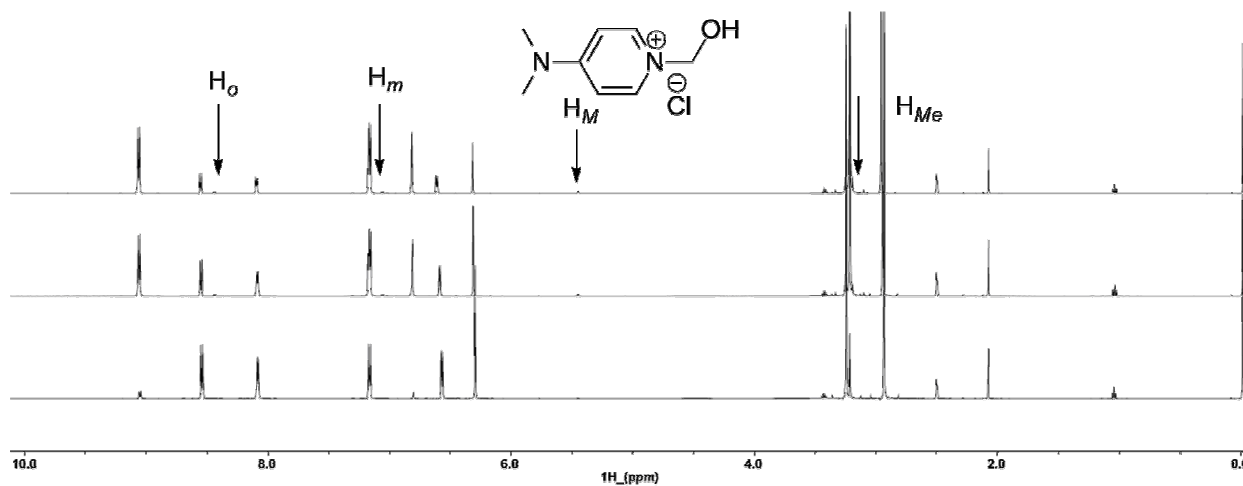

**Figure S46.** 600 MHz proton NMR spectra for the second step reaction, highlighting the small side reaction; a possible structure for the byproduct is given. The subscripts *o* and *m* refer to aromatic hydrogens *ortho* and *meta* to the ring nitrogen respectively, M refers to methylene protons and Me refers to methyl protons. Peaks at 1 and 3.4 ppm and 2 ppm are due to residual ethanol and acetone wash solvents respectively.
